# Environment-organism feedbacks drive changes in ecological interactions

Oliver J. Meacock  \*<sup>1</sup> and Sara Mitri <sup>1</sup>

<sup>1</sup>Department of Fundamental Microbiology, University of Lausanne, Lausanne, Switzerland

## Abstract

Ecological interactions, the impact of one organism on the growth and death of another, underpin our understanding of the long-term composition and the functional properties of communities. Interactions from classical ecology are typically understood to be fixed values, representing for example the per-capita consumption rate of prey by its predator. Yet in many ecosystems, such fixed descriptions are inadequate: interactions can depend on local environmental conditions, the time at which they are measured, and the sampled position in a spatially-structured community. In this work, we show that each of these three types of context-dependency can arise from feedbacks between organisms and their environment. At the heart of our theory is the ‘instantaneous interaction’, a quantity that describes whether a given population changes their surroundings in a way that helps or hinders another in a particular environment. This environmentally-dependent quantity then gives rise to time and spatial dependencies as the environment changes over time and/or space. We use small synthetic microbial communities as model ecosystems to demonstrate the power of this framework by showing how we can predict time-dependent intra-specific interactions, and how we can relate time and spatial dependencies in crossfeeding communities. Our framework helps to explain the ubiquity of interaction context-dependencies in systems where population changes are driven by environmental changes – such as microbial communities – by placing the environment on an equal theoretical footing as the organisms that inhabit it.

**Keywords:** Ecological interactions, consumer-resource modelling, microbial communities

---

\*oliver.meacock@unil.ch

## 27 **1 Introduction**

28 Interactions between organisms - the impact of one species on the fitness or growth rate of  
29 another<sup>1,2</sup> - are one of the most consistent themes in ecology. One reason for this is that they  
30 are a key component of ecological models which provide testable predictions of community co-  
31 existence outcomes.<sup>3,4</sup> Though classically used to explore macroscopic ecosystems such as  
32 foodwebs,<sup>5</sup> in recent years interaction-based frameworks have also become a subject of deep  
33 study among microbial ecologists as a means of rationally manipulating community composition  
34 and function.<sup>6,7</sup>

35 Experimentally, the gold standard for estimating microbial interactions *in vitro* is to culture  
36 a focal species alone and in co-culture with another species and then compare the resulting  
37 growth of the focal species between the two conditions.<sup>8-13</sup> While the precise measurement  
38 defined as the 'interaction' varies from study to study,<sup>14,15</sup> in each case these experiments assign  
39 a single value to the interaction between pairs of species (the inter-specific interaction) or within  
40 the population of a single species (the intra-specific interaction). These can then be inserted  
41 into a theoretical model of population dynamics which can in turn be used to predict community  
42 properties, with the generalised Lotka-Volterra (gLV) framework being among the most popular  
43 choices.<sup>7,9</sup>

44 However, microbes do not typically interact via the direct, trophic mechanisms which the Lotka-  
45 Volterra framework was originally built to describe. Instead, microbial interactions are often me-  
46 diated indirectly via abiotic intermediaries secreted into and taken up from the environment,<sup>16</sup>  
47 such as crossfed nutrients<sup>17,18</sup> and toxic compounds used to kill competitors.<sup>19</sup> Consumer-  
48 Resource models explicitly describe such mechanistic feedbacks between environmental re-  
49 sources and consuming species, and are widespread in classical ecology.<sup>20,21</sup> More recently,  
50 this framework has been extended to encompass secretion and toxicity of intermediates,<sup>22</sup>  
51 which we will refer to as the Environment-Organism (EO) framework. Comparisons between  
52 gLV and EO models have begun to reveal dynamical behaviours of EO systems that cannot be  
53 captured by direct, gLV-type interactions.<sup>23</sup> At the same time, experimental evidence has be-  
54 gun to accumulate showing that properties of microbial communities cannot necessarily be  
55 predicted from measurements of pairwise species combinations as the gLV framework would  
56 suggest.<sup>24,25</sup>

57 Context dependencies of interactions have become increasingly apparent as one explanation for  
58 this breakdown.<sup>1,14,26</sup> Specifically, interactions can vary depending on the chemical environment  
59 in which they are measured<sup>11,27-31</sup> and the time at which they are measured,<sup>32,33</sup> and spatial  
60 structure in multi-species communities is at least qualitatively understood to influence inter-  
61 species interactions.<sup>34</sup> These observations substantially complicate the fixed-interaction view  
62 that has typically been adopted by theoreticians, and present a substantial barrier to a general  
63 understanding of the properties of microbial communities and to our ability to predict their  
64 behaviour. Breaking down this barrier relies on understanding whether interactions change in  
65 predictable ways.

66 In this manuscript, we approach this problem by building a formal theoretical framework for  
67 understanding interaction context dependencies in EO systems. First, we show how a quantity  
68 we call the ‘instantaneous interaction’ – the environmentally-dependent effect that one species  
69 has on the growth of another given the local concentrations of different intermediates – arises  
70 naturally out of the fundamental equations describing EO systems. This instantaneous inter-  
71 action accumulates as the chemical environment of the system is gradually modified by the  
72 community. Communities in closed systems without influx or efflux of intermediates sweep out  
73 trajectories in the space of possible environments over time or space, and this changing envi-  
74 ronmental context leads to *predictable* variations in the instantaneous interaction. In the most  
75 dramatic cases, this can lead to switching of the sign of interactions, from positive to negative  
76 or vice versa. We then verify these predictions by measuring time-dependent interactions in  
77 an experimental model based on antibiotic degradation. Finally, we show how time dependen-  
78 cies and certain types of spatial dependency can both be explained as arising from a single  
79 set of processes, theoretically unifying the observations of two recent studies<sup>33,35</sup> on time and  
80 spatial interaction dependencies in small crossfeeding communities. Our work demonstrates  
81 that the context dependencies so often observed in microbial ecosystems are an inevitable  
82 consequence of the mechanistic basis for most microbial interactions, the feedback between  
83 microbes and their environment.

## 84 2 Results

### 85 2.1 A theoretical Environment-Organism interaction framework explains multi- 86 ple context-dependencies

87 We begin by considering general EO systems for which complex metabolic interactions can  
88 be decomposed into elementary components, each mediated by a single intermediate. Our  
89 goal will be to write a general expression for population dynamics containing an interaction  
90 term, analogous to the measurable interaction term of gLV systems but explicitly mediated by  
91 the dynamics of the intermediates. This will provide a direct link between the environmental  
92 context of the system and the measured microbial interactions.

93 EO systems can be modelled by breaking them into two distinct parts:<sup>21,22,36</sup> firstly the *impact*  
94 *function* of a species  $\beta$ ,  $f_{\beta}(\mathbf{r})$  describes the rate at which one unit of  $\beta$  modifies its chemical  
95 environment. We denote this environment with the vector  $\mathbf{r}$ , which we will restrict as represent-  
96 ing the concentrations of different intermediates (e.g. element 1 represents the concentration  
97 of glucose, while element 2 represents the concentration of acetate).  $\mathbf{r}$  defines a position in  
98 the ‘environment space’, the set of different possible combinations of concentrations of inter-  
99 mediates. The impact function is itself dependent upon  $\mathbf{r}$ , allowing it to capture, for example,  
100 concentration-dependent uptake of a resource. Generally,  $\mathbf{r}$  will also be impacted by flows of  
101 intermediates into or out of the system, denoted by  $\sigma$ . We can then write the rate of change of  
102 the chemical environment as:

$$\frac{d\mathbf{r}}{dt} = \sum_{\beta} s_{\beta} \mathbf{f}_{\beta}(\mathbf{r}) + \sigma \quad (1)$$

103 where  $s_{\beta}$  is the instantaneous abundance of species  $\beta$ . Importantly, this equation implies that  
104 the environment changes as a function of time  $t$ .

105 Secondly, the *sensitivity function*  $g_{\alpha}$  describes the per-capita growth rate of a species  $\alpha$  in a  
106 particular environment:

$$\frac{1}{s_{\alpha}} \frac{ds_{\alpha}}{dt} = g_{\alpha}(\mathbf{r}). \quad (2)$$

107 As defined here, these functions are very general, allowing expression of various relationships

108 between intermediates such as the extent to which different nutrients can be substituted for  
109 each other.<sup>21</sup>

110 Because  $g_\alpha$  is dependent on  $r$ , it is apparent that changes to the chemical environment caused  
111 by both  $\alpha$  itself ( $\beta = \alpha$ , intra-specific interactions) and the other species ( $\beta \neq \alpha$ , inter-specific  
112 interactions) (Eq. 1) will regulate  $\alpha$ 's growth rate. Breaking this regulation into the effect me-  
113 diated by each intermediate  $r_\rho$  individually, we can define 'elementary' metabolic interactions.  
114 These can be categorised into four classes by the combinations of the signs of the impact  
115 and sensitivity functions; following recently-defined terminology,<sup>22,37</sup> we refer to these here as  
116 enrichment ( $\beta$  produces a nutrient that enhances the growth of  $\alpha$ ), depletion ( $\beta$  reduces the  
117 concentration of a nutrient, impeding the growth of  $\alpha$ ), pollution ( $\beta$  produces a toxin that im-  
118 pedes the growth of  $\alpha$ ) and detoxification ( $\beta$  decreases the concentration of a toxin of  $\alpha$  and  
119 enhances its growth) (Fig. 1A).

120 Species can interact via any combination of these elementary metabolic interactions, resulting  
121 in 'composite' metabolic interactions. In general, if all elementary interactions forming a com-  
122 posite interaction mediate a positive growth-rate effect on  $\beta$  (enrichment or detoxification) the  
123 measured interaction will also be positive, if all mediate a negative growth-rate effect (depletion  
124 or pollution) the measured interaction will be negative, and if they have a mixture of positive  
125 and negative impacts the sign of the measured interaction will depend on the environmental  
126 context (Fig. 1B).

127 We can capture this environmental dependency naturally within the impact/sensitivity function  
128 framework. In *closed* ecosystems (*i.e.* systems in which there are no external sources or sinks  
129 of intermediates, so  $\sigma = 0$ ), it can be shown (Supplementary Note 1) that

$$\frac{1}{s_\alpha} \frac{ds_\alpha}{dt} = g_\alpha(r_0) + \sum_{\beta} \int_0^t a'_{\alpha\beta}(r) s_\beta d\tau, \quad (3)$$

130 where  $r_0$  is the initial environmental composition and the integral is taken over the entire history  
131 of the system up to the current time  $t$  (parameterised by  $\tau$ ). We will refer to this expression as  
132 the closed Environment-Organism (cEO) equation.

133 A key component of this expression is the *instantaneous interaction*  $a'_{\alpha\beta}$ , defined as

$$a'_{\alpha\beta}(\mathbf{r}) = \nabla g_{\alpha}(\mathbf{r}) \cdot \mathbf{f}_{\beta}(\mathbf{r}). \quad (4)$$

134  $\nabla g_{\alpha}(\mathbf{r})$  is the gradient of the sensitivity function, a vector field which denotes the direction  
135 in the environment space along which the growth rate of  $\alpha$  increases most rapidly. The scalar  
136 product of this with  $\mathbf{f}_{\beta}(\mathbf{r})$  (also a vector field) can therefore be naturally interpreted as indicating  
137 whether  $\beta$  is pulling the environment in a direction that increases (positive  $a'_{\alpha\beta}$ ) or decreases  
138 (negative  $a'_{\alpha\beta}$ ) the growth of  $\alpha$  at a given position in the environment space  $\mathbf{r}$ . Put simply, this  
139 term captures the environmental dependency of the interaction in a given environment.

140 What do the other parts of this expression tell us about the dynamics of closed ecosystems? To  
141 answer this, it is instructive to compare the cEO equation with the familiar gLV equation:

$$\frac{1}{s_{\alpha}} \frac{ds_{\alpha}}{dt} = \mu_{\alpha} + \sum_{\beta} a_{\alpha\beta} s_{\beta}. \quad (5)$$

142 Here,  $\mu_{\alpha}$  is  $\alpha$ 's intrinsic growth rate (i.e. its growth in the absence of other species and at  
143 low population sizes) and  $a_{\alpha\beta}$  is the interaction between  $\beta$  and  $\alpha$ , defined as the population-  
144 dependent impact of  $\beta$  on the growth rate of  $\alpha$ . We note some similarities between the two  
145 equations: both are expressed in terms of a basal growth rate added to a sum of interaction  
146 terms from all species  $\beta$  interacting with  $\alpha$ . However, there are two important distinctions be-  
147 tween the notion of interactions in the cEO and gLV frameworks. Firstly, as previously noted,  
148  $a'_{\alpha\beta}(\mathbf{r})$  is dependent on the environmental context. Moreover, this environment-dependence  
149 is not static - in general, closed ecosystems trace out some trajectory  $\mathbf{r}(t)$  in the environment  
150 space, over which  $a'_{\alpha\beta}(\mathbf{r})$  can vary dramatically. Indeed, we will soon see that in many sys-  
151 tems it can change sign over time and space. Secondly, interactions in the EO framework are  
152 cumulative, arising from the integration of the interaction term over the entire history of the  
153 system. This reflects the fact that interactions are mediated via concentration changes in pools  
154 of different intermediates, which take time to be impacted by organisms. We refer to the re-  
155 sulting net impact of  $\beta$  on  $\alpha$ 's growth rate at a given time  $t$  ( $\int_0^t a'_{\alpha\beta}(\mathbf{r}) s_{\beta} d\tau$ ) as the *cumulative*  
156 *interaction*.

157 In the remainder of this manuscript, we discuss the consequences of the cEO equation for our  
158 understanding of the dynamics of closed ecosystems. Specifically, we show how the environ-

159 mental dependency of the instantaneous interaction results in temporal interaction dependen-  
160 cies and spatial structure when the environmental context changes over time and space (Fig.  
161 1C).

## 162 2.2 Composite interactions can result in time-dependencies of interaction mea- 163 surements

164 To develop and illustrate these ideas, we consider here one of the simplest composite interac-  
165 tions, a single species  $\mathcal{A}$  interacting negatively with itself via nutrient depletion and positively  
166 via detoxification (Fig. 2A) in a well-mixed batch culture. We take the impact (Fig. 2B) and sensi-  
167 tivity functions (Fig. 2C) for this system from a previously described EO framework<sup>11</sup> (Methods).  
168 Calculation of the instantaneous intra-specific interaction  $a'_{\mathcal{A}\mathcal{A}}$  (Fig. 2D) recapitulates the en-  
169 vironmental dependency of interactions in this system, with positive intra-specific interactions  
170 generally dominating at high toxin concentrations and negative intra-specific interactions dom-  
171 inating at low toxin concentrations. This static map is traversed by the system as it evolves from  
172 some initial state  $r_0$ , following the trajectory  $r(t)$ . We can see in Fig. 2E that in this particular  
173 case, the system generally moves towards the origin as  $\mathcal{A}$  reduces the concentration of both the  
174 nutrient  $[n]$  and the toxin  $[q]$ . Importantly, this means that  $a'_{\mathcal{A}\mathcal{A}}$  can switch from being positive  
175 early to being negative later on.

176 This switch in sign of the instantaneous intra-specific interaction propagates through to  $\mathcal{A}$ 's  
177 growth rate. As there are no other species in this system, the sole growth rate effect is the  
178 time-dependent impact of  $\mathcal{A}$  on its own growth – the cumulative intra-specific interaction –  
179 given by  $\int_0^t a'_{\mathcal{A}\mathcal{A}}(r) s_{\mathcal{A}} d\tau$ . This switches from positive to negative once the accumulated ben-  
180 efit of the removal of the toxin is outweighed by the accumulated penalty from the reduction  
181 in the nutrient concentration (Fig. 2F). We now introduce a third quantity, the *measured inter-*  
182 *action*, which is based on the abundance timecourses resulting from the integral of  $\mathcal{A}$ 's growth  
183 rate. This is an experimentally tractable value, closely related to the interaction measurements  
184 typically taken from batch-culture experiments<sup>13</sup> (see next section). In the simulated system,  
185 the sign switch in the instantaneous and cumulative interactions is reflected in a sign switch in  
186 this measured interaction (Fig. S1). We therefore arrive at an unexpected prediction: measure-  
187 ments of the intra-specific interaction in such systems should give positive values if performed  
188 early on (when detoxification dominates) and negative values if performed later (when depletion

189 dominates).

### 190 **2.3 An antibiotic-based experimental system demonstrates sign-switching of** 191 **the intra-specific interaction**

192 We now attempted to establish whether this prediction was borne out in an experimental set-  
193 ting. As an experimental model of the detoxification/depletion interaction network (Fig. 2A),  
194 we made use of a bacterium (*Comamonas testosteroni*) that can degrade  $\beta$ -lactam antibiotics  
195 via induced secretion of  $\beta$ -lactamases (Fig. S2) and which can utilise proline as a sole carbon  
196 source.  $\beta$ -lactamase-producing bacteria are typically associated with a phenomenon known as  
197 the inoculum effect, in which larger starting population sizes result in higher measured Minimum  
198 Inhibitory Concentrations (MICs) of the antibiotic.<sup>38,39</sup> This is due to more rapid degradation of  
199 the antibiotic at larger initial population sizes, an effect already suggestive of a positive intra-  
200 specific interaction. Combined with a depletion mechanism mediated by competition over lim-  
201 ited proline as a sole carbon source, we speculated that we would observe a positive to negative  
202 intra-specific interaction shift in a time-dependent manner as predicted theoretically.

203 To address this, we prepared arrays of environmental conditions (with varying initial proline,  
204 [pro]<sub>0</sub>, and ampicillin, [amp]<sub>0</sub>, concentrations) within 96-well plates (Fig. 3A). Each condition  
205 was split into two sets of wells, one inoculated with exponential-phase *C. testosteroni* cells at  
206 high density and the second at low density. Absorbance-based growth curves of these cultures  
207 were then measured in a plate reader.

208 In typical experimental measurements of interactions, monoculture and co-culture assays are  
209 prepared with a constant inoculation density of a focal species. The interaction is then mea-  
210 sured by detecting whether this initial population grows more or less in the presence of a sec-  
211 ond species.<sup>11,13,40,41</sup> By direct analogy, we can treat our low inoculation density condition as  
212 a ‘monoculture-like’ assay, with a corresponding sub-population in the high-density condition  
213 which is of equal size. In the high-density condition, this sub-population is effectively co-  
214 cultured with a second sub-population of the same species. We can therefore measure the  
215 intra-specific interaction by comparing the fate of the matching sub-populations in the high-  
216 and low-density conditions (Fig. 3B).

217 In practice, this is achieved by dividing the growth curve of the high-density culture by the ra-  
218 tio of inoculation densities (4:1), yielding the size of the sub-population as a function of time.



219 At times when this normalised curve is higher than that of the low inoculation density con-  
220 dition, we can infer that the presence of additional cells of the same species enhanced the  
221 sub-population's growth - *i.e.* that a positive intra-specific interaction has occurred. The op-  
222 posite argument applies when the normalised curve is lower than that of the low inoculation  
223 density condition (Fig. 3B). To measure the intra-specific interaction as a function of time, we  
224 can therefore simply subtract the low inoculation density curve from the normalised high inoc-  
225 ulation density curve (Fig. 3C). We considered several alternative definitions of the measured  
226 interaction (Fig. S1D-G), but found that the chosen abundance difference metric provided the  
227 optimal balance between capturing the shape of the cumulative interaction and robustness to  
228 measurement noise. We note that it is similar to accepted endpoint-based interaction met-  
229 rics,<sup>13</sup> although we emphasise that in contrast to these measurements which yield a single,  
230 fixed value, our approach yields a time-varying interaction estimate.

231 Beginning with the control conditions with zero antibiotic, we observe that the low inoculation  
232 density curves look very similar to the high inoculation density curves aside from a consistent  
233 time delay (Fig. S3A). We can interpret this delay as arising mostly from the smaller initial  
234 number of cells in the low density condition, as the ratio of densities between the two con-  
235 ditions remains approximately equal to the inoculation ratio until the high-density condition  
236 approaches stationary phase (at around 35 hrs). This is reflected in the abundance difference,  
237 which displays an approximately neutral intra-specific interaction up to this point and a neg-  
238 ative interaction afterwards (Fig. 3D). In the presence of antibiotic the time delay between  
239 the two conditions increases, presumably because the smaller initial population takes longer  
240 to degrade the ampicillin before being able to start growing (Fig. S3B). Consequently, we see  
241 a concentration-dependent positive interaction emerging with increasing ampicillin doses, as  
242 predicted by the model (Fig. 3E). Ultimately however, all environments resulted in negative in-  
243 teractions in the long term. Summarising these experimental results by considering the peak  
244 and final abundance differences demonstrates the environmental and time dependencies to-  
245 gether (Fig. 3F,G), which qualitatively match the patterns predicted by our modelling framework  
246 (Fig 3H,I). Although we do not directly fit model parameters to our data, we find that these qual-  
247 itative patterns are robust to large changes in parameter values, suggesting that these results  
248 are not a result of fine-tuning of the model (Fig. S4).

249 Evolutionary rescue can result in similar abundance trajectories as those described here, as a

250 small number of mutant cells with antibiotic-resistant genotypes can grow to fixation after a long  
251 time delay.<sup>42,43</sup> We explored the role of evolution in our experimental system by measuring the  
252 MIC of ampicillin for each culture at the end of one of our interaction measurement timecourses  
253 (Fig. S5), finding that there was indeed a small increase ( $\approx 50\%$ ) in the resistance of populations  
254 exposed to the highest ampicillin concentrations compared to those grown under antibiotic-  
255 free conditions. However, simulations incorporating the evolution of resistance showed that  
256 such events, far from driving the observed interaction time dependencies, tend to attenuate  
257 measured positive interactions if they have any effect at all (Fig. S6). Thus, we concluded that  
258 the consistent positive to negative interaction switch that we observe arises from the changing  
259 dominance of the two elementary interactions (detoxification and depletion), as suggested by  
260 our theoretical framework.

## 261 **2.4 Small crossfeeding communities illustrate the common origins of time-** 262 **dependent interactions and spatial structure**

263 Thus far, we have considered time and environmental dependencies in a mono-species system.  
264 However, our framework generalises quite readily to multi-species communities, as well as cer-  
265 tain types of spatially-structured communities (Methods, Supplementary Note 2, Fig. S7). Two  
266 recent studies have described time<sup>33</sup> and spatial<sup>35</sup> dependencies of very similar two-species  
267 communities. In both cases, a degrader species consumes a polymer (chitin or dextran) and  
268 subsequently produces a metabolite (acetate or glucose) which can be consumed by the second  
269 crossfeeding community member. When the polymer is exhausted, the degrader species can  
270 switch from net production to net consumption of the crossfed metabolite (Fig. 4A). Daniels  
271 et al.<sup>33</sup> note a time-dependency of the inter-specific interactions in batch culture: supply of  
272 an initial quantity of polymer leads initially to a strongly positive degrader  $\rightarrow$  crossfeeder in-  
273 teraction and a neutral crossfeeder  $\rightarrow$  degrader interaction, changing later to a weakly positive  
274 crossfeeder  $\rightarrow$  degrader interaction and a weakly negative crossfeeder  $\rightarrow$  degrader interaction  
275 (Fig. 4B). In a separate study, Wong et al.<sup>35</sup> loaded a similar community into a microfluidic  
276 device consisting of a single channel along which flow was applied. They observe that this  
277 community spontaneously self-structures along the channel, with the crossfeeding species only  
278 being able to grow towards its outlet (Fig. 4C). Given the commonalities between the two stud-  
279 ies, we decided to use them as case studies for how our framework can unify similar observations  
280 occurring across time or space.

281 We built an EO model of the degrader/crossfeeder community, labelling the degrader population  
282  $\mathcal{D}$  and the crossfeeder population  $\mathcal{C}$ . We then derived expressions for the four different instanta-  
283 neous interactions  $a'_{\mathcal{D}\mathcal{D}}$ ,  $a'_{\mathcal{D}\mathcal{C}}$ ,  $a'_{\mathcal{C}\mathcal{D}}$  and  $a'_{\mathcal{C}\mathcal{C}}$  (Methods). As shown in Fig. 4D, these four quantities  
284 can be arranged analogously to the interaction matrix of the gLV framework, with intra-specific  
285 interactions located along the main diagonal and inter-specific interactions located off this axis.  
286 However, instead of being represented by a single value as in the gLV approach, the instanta-  
287 neous interactions are expanded into scalar fields defined on the entire environment space,  
288 capturing the environmental-dependency of each different interaction. Both the degrader's  
289 intra-specific instantaneous interaction  $a'_{\mathcal{D}\mathcal{D}}$  and inter-specific instantaneous interaction  $a'_{\mathcal{C}\mathcal{D}}$   
290 contain both positive and negative regions, reflecting the changing balance between the enrich-  
291 ment mechanism (production of the crossed metabolite from the polymer) and the depletion  
292 mechanism (competition over the crossed metabolite) in different environments.

293 In batch culture, organisms modify their environment by secreting and consuming intermedi-  
294 ates over time. A similar effect occurs in flowing systems, whereby the intermediates within a  
295 parcel of fluid are sequentially modified by the organisms residing at successive spatial loca-  
296 tions as it is transported downstream. We can therefore project trajectories representing the  
297 evolution of the environment over time in a batch culture system (Fig. 4D, dashed lines) and the  
298 spatial variation of the environment along the length of a system under flow at steady-state (Fig.  
299 4D, solid lines) onto these instantaneous interaction maps, allowing us to interpret the changing  
300 interactions over time and space using the same framework (Methods, Supplementary Note 2).  
301 The initial position of the system  $r_0$  – here assumed to consist of a large amount of polymer  
302 and zero crossed metabolite – is interpreted subtly differently between the two cases: in batch  
303 culture, this represents the initial composition of the inoculum media, while in the microfluidic  
304 channel this represents the fixed composition of the media in the inflow of the device. Both sys-  
305 tems sweep out initial trajectories with similar shapes, suggesting that the temporal patterning  
306 of the batch culture and the spatial patterning of the channel may arise from similar changes  
307 in interaction strengths.

308 To explore this in more detail, we now broke down the growth dynamics in the batch culture  
309 simulations into cumulative interactions, focusing on the inter-specific cases (Fig. 4E,F). We  
310 observe a similar pattern of the time evolution in the batch culture interactions as in the original  
311 study (Fig. 4B,E). In the initial phase, the large amount of initial polymer is metabolised by the

312 degrader, resulting in large amounts of overspill in the form of the crossfed metabolite. This  
313 consequently substantially enhances the growth of the crossfeeder, while the relatively low utility  
314 of the crossfed metabolite at this point for the degrader limits the impact of its uptake by the  
315 crossfeeder on the growth of the degrader. Later, the switch of the degrader to metabolite  
316 uptake leads to a decrease in the strength of the net-positive interaction with the crossfeeder,  
317 and a negative impact of the crossfeeder on the growth of degrader.

318 Very similar effects arise as we consider the spatially structured system (Fig. 4G,H). Near the  
319 inlet, the crossfeeder cannot grow as the rate at which it is washed out of the device ( $\theta$ ) ex-  
320 ceeds the growth rate sustained at very low metabolite concentrations. However, the activity  
321 of the degrader leads to a gradual enhancement of the environment for the crossfeeder along  
322 the length of the channel and ultimately leads to the opening of a new niche when the cumu-  
323 lative interaction from the degrader to the crossfeeder exceeds the threshold set by  $\theta$ . This  
324 leads to the spatial structure observed in the original study, with the crossfeeder only growing  
325 towards the outlet of the device (Fig. 4C,H). Our model also reproduces the suppressive effect  
326 of increased flow rates on the growth of the crossfeeder, as observed experimentally:<sup>35</sup> higher  
327 flowrates cause the environmental trajectory to terminate with less monomer and polymer hav-  
328 ing been consumed due to more rapid wash-out of the two substrates (Fig. S8A). Combined  
329 with a higher mortality  $\theta$  associated with the stronger flow, this ultimately prevents the cross-  
330 feeder's niche from being efficiently opened up and halts its growth (Fig. S8B-G). In summary,  
331 our framework shows how spatial patterns arising under uni-directional flow and interaction  
332 time-dependencies in well-mixed systems are reflections of the same underlying ecological  
333 processes.

### 334 **3 Discussion**

335 Context dependencies have long been understood to be an important factor in ecological sys-  
336 tems.<sup>1,26,44-46</sup> However, theoretical models that have attempted to capture these dependen-  
337 cies have generally done so via *ad hoc* manipulations of the interaction parameters,<sup>47,48</sup> rather  
338 than showing how these changes arise spontaneously out of the underlying reciprocal effects  
339 between organisms and their environment. By contrast, our approach shows how such depen-  
340 dencies emerge within EO models, which explicitly describe the bidirectional impact between  
341 the environment and the species within it. It also provides a theoretical framework to predict

342 interaction changes, given a hypothesis about the underlying metabolic processes at play in  
343 the ecosystem. We note that the long history of the EO framework<sup>20-22,36,49</sup> and its widespread  
344 use in microbial ecology<sup>11,15,23,29,31,50,51</sup> provides a wealth of existing experimental and theoret-  
345 ical results that may be re-interpreted through the cEO equation we derive in this study (Eq.  
346 3).

347 Our results have particular relevance for our understanding of the outcomes of batch culture  
348 interaction measurements.<sup>10-13,40,41</sup> The mechanism by which measured interactions in batch  
349 culture switch from positive to negative over time once a single nutrient become limiting (Fig.  
350 3) is quite general, and suggests that measurements based on end-point abundances may miss  
351 positive interactions during early community establishment. This may at least partially explain  
352 the ongoing controversy surrounding the relative distribution of negative and positive interac-  
353 tions in natural communities, where the predominance of negative interactions as estimated  
354 by end-point batch culture methods appears to be at odds with findings based on alternative  
355 approaches.<sup>8,13,41,52,53</sup>

356 We also note that despite our focus on microbial ecosystems, our results should also hold true  
357 for macroscopic ecosystems as long as the assumptions of our framework – particularly the  
358 assumption that the system is closed – are at least approximately true. Indeed, the role of the  
359 interplay between organisms and their environment has long been understood to drive succes-  
360 sional dynamics in plant ecosystems, in which modification of the local environment by early  
361 pioneer species leads to the opening of new niches and eventual replacement of pioneers by  
362 latecomers better adapted for the new environment.<sup>54</sup> Similar successional patterns are ob-  
363 served in macroscopic systems such as whale falls<sup>55</sup> and microscopic systems such as marine  
364 snow.<sup>18,56</sup> In the language of our framework, successional effects would be represented as an  
365 accumulating, time-dependent positive interaction from pioneer species to latecomers. There  
366 may also be accumulating negative interactions from the latecomers to the pioneers, reflect-  
367 ing the tendency of pioneers to eventually be replaced during the successional sequence.<sup>18</sup>  
368 Likewise, although we have focused on microfluidic channels as models of systems under uni-  
369 directional flow, analogous systems such as rivers and the gut are widespread. The spatial  
370 niche-opening effects that our framework describes may therefore at least partially explain the  
371 longitudinal patterning of organisms in such systems.<sup>57-59</sup>

372 Another point of interest that this work sheds light on is the long-standing issue of higher order

373 interactions (HOIs) in microbial ecosystems, a phenomenon whereby the interaction between  
374 two partners is modulated by the presence of additional community members.<sup>60,61</sup> While HOIs  
375 have long been understood as arising from environment-organism feedbacks,<sup>49,62,63</sup> their ap-  
376 pearance in microbial ecosystems is currently poorly accounted for. Our framework provides  
377 a simple explanation for these effects in closed systems: additional community members de-  
378 flect the environmental trajectory  $r(t)$  (or  $r(x)$ ) from the path taken in the two-species case,  
379 changing the timecourse (or spatial pattern) of the instantaneous interactions experienced by  
380 both species and thereby altering their cumulative interactions. We therefore expect HOIs to  
381 be widely observed whenever more than two community members interact with a single in-  
382 termediate, echoing simulational<sup>62</sup> and experimental<sup>25</sup> findings. We note however that many  
383 forms of HOI, such as those arising from phenotypic changes induced by a third species,<sup>64</sup>  
384 are not readily incorporated into EO models and consequently must be investigated by other  
385 means.

386 Nevertheless, there are some limitations to our framework. Perhaps most important is its limita-  
387 tion to closed ecosystems, contrary to most microbial communities in nature which are typically  
388 subject to external influxes and effluxes of material. In our framework, this assumption is ex-  
389 pressed by assuming that the source term  $\sigma$  is equal to zero, but more generally a non-zero  
390 value of this term might represent the flow of resources into a well-mixed community (for exam-  
391 ple in a chemostat<sup>65</sup>) or diffusive transport of intermediates between neighbouring locations in  
392 a spatial model.<sup>51</sup> While we can derive an expression equivalent to the cEO equation for such  
393 open systems (Supplementary Note 1), the additional integral involving  $\sigma$  complicates its inter-  
394 pretation; certainly the analogy to the familiar gLV framework is lost. However, open systems  
395 more closely match the modelling assumptions of the gLV framework,<sup>15</sup> meaning direct gLV-  
396 based descriptions may be an appropriate alternative. Indeed, around an equilibrium point in  
397 an open system the quantity  $a'_{\alpha\beta}$  becomes equivalent to the community matrix of the gLV frame-  
398 work  $a_{\alpha\beta}$ ,<sup>22</sup> providing a tantalising connection between the two approaches. In addition, our  
399 assumption that indirect interactions dominate in microbial ecosystems, while well-supported  
400 for many systems,<sup>16</sup> cannot account for direct interaction mechanisms such as predation<sup>66</sup>  
401 or contact-dependent systems.<sup>67</sup> These may be incorporated into Eq. 3 simply by adding the  
402 standard gLV description of density-dependent interactions ( $\sum_{\beta} a_{\alpha\beta}s_{\beta}$ ), although this hybrid  
403 direct/indirect interaction description is again less simple to interpret than the base cEO equa-  
404 tion. We intend to address these extensions in future work.

405 In summary, our work shows that much of the diversity of interaction context-dependencies  
406 can be explained by reciprocal feedbacks between organisms and their environment. We give  
407 multiple examples of how explicit theoretical representation of these feedbacks can be used to  
408 predict and interpret interaction changes, providing a path forwards in the effort to manipulate  
409 interactions to predictable ends. Ultimately, we anticipate that a renewed focus on the role of  
410 the environment in determining the properties of microbial ecosystems will open new methods  
411 for controlling communities, as well as help to resolve longstanding questions regarding their  
412 composition and diversity.

## 413 **4 Acknowledgements**

414 We would like to thank E. Ulrich, M. Amicone, S. Sulheim, C. Vulin, A. Del Panta, P. Padmanabha, G.  
415 Ugolini and J. Palmer for their valuable comments on a previous version of this manuscript. We  
416 would also like to thank J. Wong for sharing microfluidic data. OJM was supported by an HFSP  
417 long-term fellowship (LT0020/2022-L), while SM was supported by the NCCR Microbiomes and  
418 an Eccellenza grant both from the Swiss National Science Foundation.

## 419 **5 Data and code availability statement**

420 All data and code used in this study (apart from data reproduced from other studies, Fig. 4B,C)  
421 is available at <https://github.com/Mitri-lab/enviroInteracts>.

## 422 6 Materials and methods

### 423 6.1 Modelling

#### 424 6.1.1 Toxin-nutrient model

425 Our single-species toxin-nutrient model (Fig. 2A) is adapted from a previously described EO  
426 framework.<sup>11</sup> We model the growth rate of a single species  $\mathcal{A}$ , with abundance denoted as  $s_{\mathcal{A}}$ , as  
427 being positively dependent upon the concentration of a nutrient  $[n]$  and negatively dependent  
428 upon the concentration of a toxin  $[q]$ . We assume that both of these positive and negative  
429 growth impacts are saturating functions of their respective intermediates, modelled as Monod  
430 functions. We further assume that the concentrations of the intermediates are measured in units  
431 of the half-velocity constant of the two Monod terms and that a fraction  $f$  of the utilised nutrient  
432 is invested into detoxification and the remainder into growth. Together, these assumptions give  
433 the per-capita growth rate as

$$\frac{1}{s_{\mathcal{A}}} \frac{ds_{\mathcal{A}}}{dt} = (1 - f) \frac{\nu_n [n]}{[n] + 1} - \frac{\nu_q [q]}{[q] + 1}, \quad (6)$$

434 where  $\nu_n$  is the maximal nutrient uptake rate and  $\nu_q$  is the maximal toxin impact.

435 The impact functions of the original model incorporate a yield parameter that describes the  
436 efficiency at which resources are converted into biomass.<sup>11</sup> However, we can remove this pa-  
437 rameter by non-dimensionalisation if we define the bacterial abundance  $s_{\mathcal{A}}$  as being measured  
438 in terms of the amount of biomass produced by one unit of nutrient with zero toxin degradation  
439 investment ( $f = 0$ ) and zero toxin ( $[q] = 0$ ). Then we can write the nutrient dynamics as

$$\frac{d[n]}{dt} = -s_{\mathcal{A}} \frac{\nu_n [n]}{[n] + 1}. \quad (7)$$

440 Toxin dynamics are modelled similarly but involve an additional term, the detoxification effi-  
441 ciency  $\delta$ , which sets the amount of toxin removed from the environment for each unit of nutrient  
442 invested. Thus we obtain

$$\frac{d[q]}{dt} = -s_{\mathcal{A}} \delta f [q] \frac{\nu_n [n]}{[n] + 1}. \quad (8)$$



443 For simplicity, we do not incorporate a passive (nutrient-independent) toxin uptake term as  
 444 in.<sup>11</sup>

445 Defining the environment vector  $\mathbf{r} = \begin{pmatrix} [n] \\ [q] \end{pmatrix}$ , the impact function  $\mathbf{f}_{\mathcal{A}}(\mathbf{r})$  can be written from Eqs.  
 446 7 and 8 as

$$\mathbf{f}_{\mathcal{A}}(\mathbf{r}) = -\frac{\nu_n[n]}{[n]+1} \begin{pmatrix} 1 \\ \delta f[q] \end{pmatrix}. \quad (9)$$

447 We note that Eq. 6 is already in the form of a sensitivity function  $g_{\mathcal{A}}(\mathbf{r})$ . We can therefore derive  
 448 its gradient as

$$\nabla g_{\mathcal{A}}(\mathbf{r}) = \begin{pmatrix} \frac{(1-f)\nu_n}{([n]+1)^2} \\ \frac{-\nu_q}{([q]+1)^2} \end{pmatrix}, \quad (10)$$

449 and so,

$$a'_{\mathcal{A}\mathcal{A}} = \nabla g_{\mathcal{A}}(\mathbf{r}) \cdot \mathbf{f}_{\mathcal{A}}(\mathbf{r}) = \frac{\nu_n[n]}{[n]+1} \left( \nu_q \delta f \frac{[q]}{([q]+1)^2} - (1-f) \frac{\nu_n}{([n]+1)^2} \right), \quad (11)$$

450 with a non-trivial nullcline  $a'_{\mathcal{A}\mathcal{A}} = 0$  at

$$[n] = -1 + \sqrt{\frac{(1-f)\nu_n([q]+1)^2}{[q]f\delta\nu_q}}. \quad (12)$$

451 Parameter values for this model as used in this manuscript are given in table 1. These were  
 452 not explicitly fitted to our experimental data but were chosen to qualitatively match our experi-  
 453 mental results, representing a regime in which the toxin has a comparable negative growth rate  
 454 impact as the nutrient's positive impact ( $\nu_n = \nu_q$ ) but is efficiently degraded with a relatively low  
 455 degradation investment. Given our non-dimensionalisation of the half-velocity constants, the  
 456 range of initial concentrations  $[n]_0$  and  $[q]_0$  shown in Fig. 3H,I is also of significance; our choice  
 457 of  $0.5 < [n]_0 < 5$  and  $[q]_0 < 0.5$  indicates that the nutrients are close to saturation for most  
 458 of the simulated conditions, while the toxin will have an approximately linearly concentration-  
 459 dependent effect. Large changes to these parameter values do not generally have a strong ef-  
 460 fect on the overall interaction patterns, although we do observe qualitatively different outcomes

| $\nu_n$ | $\nu_q$ | $f$ | $\delta$ |
|---------|---------|-----|----------|
| 0.05    | 0.05    | 0.2 | 10       |

Table 1: Parameter values used for the toxin-nutrient model of section 6.1.1

461 when the strength of the toxin compared to the nutrient is increased to such an extent that it  
462 entirely abolishes growth in either the low inoculation density condition or both conditions (Fig.  
463 S4).

### 464 6.1.2 Degradation-crossfeeder model

465 We model the system described in Fig. 4A by considering the dynamics of the degrader popula-  
466 tion  $\mathcal{D}$ , the crossfeeder population  $\mathcal{C}$ , the polymer  $p$  and the crossfed metabolite  $m$ . We assume  
467 that  $\mathcal{D}$  consumes  $p$  according to Monod kinetics, utilising a fixed fraction  $1 - \phi$  for its own  
468 growth and converting the remaining fraction  $\phi$  into  $m$ . This is in turn utilised by both  $\mathcal{C}$  and  $\mathcal{D}$   
469 for growth, again according to Monod kinetics.

470 We note that our model is structured such that  $\mathcal{D}$  has priority access to the breakdown products  
471 of  $p$ . In similar systems, these breakdown products act as extracellular public goods, with both  
472 degraders and crossfeeders having equal access to them.<sup>68</sup> However, in the studies we consider  
473 here, two similar mechanisms preserve the priority status of the degrader: in Wong et al.<sup>35</sup>, the  
474 degrader *Bacteroides thetaiotaomicron* appears to import dextran and degrade it internally, as  
475 suggested by the upregulation of various nutrient importers and cytosolic dextranases in the  
476 presence of dextran. The breakdown products - principally glucose - can therefore largely be  
477 maintained as internal private goods, with the excess leaking out and acting as the nutrient  
478 source for the crossfeeder *Bacteroides fragilis*. Similarly, while the degrader *Vibrio natriegens*  
479 of Daniels et al.<sup>33</sup> does appear to release digestive enzymes to break down chitin externally, the  
480 resulting breakdown products cannot be metabolised directly by the crossfeeder *Alteromonas*  
481 *macleodii*. Instead, they must first be converted to acetate by the internal catabolic metabolism  
482 of the degrader. Thus, the crossfeeder must again wait until the substrate has passed through  
483 a stage in which it is a private good of the degrader, effectively separating the two species into  
484 different trophic levels.<sup>69</sup>

485 Denoting the environment vector  $r = \begin{pmatrix} [p] \\ [m] \end{pmatrix}$  and subscripting yield parameters  $Y$ , half-saturation  
486 constants  $K$  and maximal rate constants  $\nu$  with labels denoting species and intermediate, this  
487 model is described by the sensitivity functions

$$g_{\mathcal{D}}(\mathbf{r}) = (1 - \phi) \frac{\nu_{\mathcal{D}p}[p]}{[p] + 1} + \frac{\nu_{\mathcal{D}m}[m]}{[m] + K_{\mathcal{D}m}}, \quad (13a)$$

$$g_{\mathcal{C}}(\mathbf{r}) = \frac{\nu_{\mathcal{C}m}[m]}{[m] + K_{\mathcal{C}m}}. \quad (13b)$$

488

489 Note that a similar non-dimensionalisation has been applied here as for the toxin-nutrient  
 490 model, with the polymer concentration being measured in terms of the half-saturation constant  
 491 for the degrader ( $K_{\mathcal{D}p}$ ).

492 We also have corresponding impact functions given by:

$$\mathbf{f}_{\mathcal{D}}(\mathbf{r}) = \begin{pmatrix} -\frac{\nu_{\mathcal{D}p}[p]}{[p]+1} \\ \phi \frac{\nu_{\mathcal{D}p}[p]}{[p]+1} - \frac{1}{Y_{\mathcal{D}m}} \frac{\nu_{\mathcal{D}m}[m]}{[m]+K_{\mathcal{D}m}} \end{pmatrix}, \quad (14a)$$

$$\mathbf{f}_{\mathcal{C}}(\mathbf{r}) = \begin{pmatrix} 0 \\ -\frac{1}{Y_{\mathcal{C}m}} \frac{\nu_{\mathcal{C}m}[m]}{[m]+K_{\mathcal{C}m}} \end{pmatrix}, \quad (14b)$$

493

494 where the yield constant  $Y_{\mathcal{D}p}$  has likewise been eliminated via non-dimensionalisation, along  
 495 with a factor specifying the number of units of metabolite produced per unit of polymer.

496 The gradients of the sensitivity functions are given as

$$\nabla g_{\mathcal{D}}(\mathbf{r}) = \begin{pmatrix} (1 - \phi) \frac{\nu_{\mathcal{D}p}}{([p]+1)^2} \\ \frac{\nu_{\mathcal{D}m} K_{\mathcal{D}m}}{([m]+K_{\mathcal{D}m})^2} \end{pmatrix}, \quad (15a)$$

$$\nabla g_{\mathcal{C}}(\mathbf{r}) = \begin{pmatrix} 0 \\ \frac{\nu_{\mathcal{C}m} K_{\mathcal{C}m}}{([m]+K_{\mathcal{C}m})^2} \end{pmatrix}, \quad (15b)$$

497 leading to the instantaneous interactions

| $\nu_{\mathcal{D}p}$ | $\nu_{\mathcal{D}m}$ | $\nu_{\mathcal{C}m}$ | $Y_{\mathcal{D}m}$ | $Y_{\mathcal{C}m}$ | $K_{\mathcal{D}m}$ | $K_{\mathcal{C}m}$ | $\phi$ |
|----------------------|----------------------|----------------------|--------------------|--------------------|--------------------|--------------------|--------|
| 1                    | 1                    | 1                    | 1                  | 1                  | 1                  | 1                  | 0.6    |

Table 2: Parameter values used for the degrader-crossfeeder model of section 6.1.2

$$a'_{\mathcal{C}\mathcal{C}}(\mathbf{r}) = -\frac{1}{Y_{\mathcal{C}m}} \frac{\nu_{\mathcal{C}m}^2 K_{\mathcal{C}m} [m]}{([m] + K_{\mathcal{C}m})^3}, \quad (16a)$$

$$a'_{\mathcal{C}\mathcal{D}}(\mathbf{r}) = \frac{\nu_{\mathcal{C}m} K_{\mathcal{C}m}}{([m] + K_{\mathcal{C}m})^2} \left( \phi \frac{\nu_{\mathcal{D}p} [p]}{[p] + 1} - \frac{1}{Y_{\mathcal{D}m}} \frac{\nu_{\mathcal{D}m} [m]}{[m] + K_{\mathcal{D}m}} \right), \quad (16b)$$

$$a'_{\mathcal{D}\mathcal{C}}(\mathbf{r}) = -\frac{1}{Y_{\mathcal{C}m}} \frac{\nu_{\mathcal{D}m} K_{\mathcal{D}m}}{([m] + K_{\mathcal{D}m})^2} \frac{\nu_{\mathcal{C}m} [m]}{([m] + K_{\mathcal{C}m})}, \quad (16c)$$

$$a'_{\mathcal{D}\mathcal{D}}(\mathbf{r}) = (\phi - 1) \frac{\nu_{\mathcal{D}p}^2 [p]}{([p] + 1)^3} + \frac{\nu_{\mathcal{D}m} K_{\mathcal{D}m}}{([m] + K_{\mathcal{D}m})^2} \left( \phi \frac{\nu_{\mathcal{D}p} [p]}{[p] + 1} - \frac{1}{Y_{\mathcal{D}m}} \frac{\nu_{\mathcal{D}m} [m]}{[m] + K_{\mathcal{D}m}} \right). \quad (16d)$$

498 The non-trivial nullcline of the inter-specific instantaneous interaction  $a'_{\mathcal{C}\mathcal{D}} = 0$  is given by

$$[p] = \frac{[m] \nu_{\mathcal{D}m}}{\phi \nu_{\mathcal{D}p} Y_{\mathcal{D}m} ([m] + K_{\mathcal{D}m}) - \nu_{\mathcal{D}m} [m]}. \quad (17)$$

499 The nullcline of the intra-specific instantaneous interaction  $a'_{\mathcal{D}\mathcal{D}} = 0$  was found numerically  
500 using scipy's root function.

501 Parameter values for this model are given in table 2. Similarly to the toxin-nutrient model these  
502 are not explicitly fitted to the experimental data, and indeed we expect that they are substantially  
503 different between the two systems used in the studies we discuss here.<sup>33,35</sup> Such a qualitative  
504 approach does, however, allow us to determine the minimal differences between the underlying  
505 metabolic processes needed to bring about the observed interaction patterns in both systems.  
506 In particular, we find that we can reproduce the observed patterns if all metabolic processes  
507 (polymer degradation by the degrader and monomer uptake by both species) have equivalent  
508 kinetics ( $\nu_{\mathcal{D}p} = \nu_{\mathcal{D}m} = \nu_{\mathcal{C}m}$  and  $K_{\mathcal{D}m} = K_{\mathcal{C}m}$ ), the yields of the monomer and polymer are equal  
509 ( $Y_{\mathcal{D}m} = Y_{\mathcal{C}m}$ ) and a fairly high proportion of polymer is converted to monomer and secreted ( $\phi =$   
510 0.6). We also assume that the polymer is introduced at a concentration below the corresponding  
511 half-velocity constant of the degrader ( $[p]_0 = 0.8$ ), meaning the rate of polymer degradation will  
512 be strongly impacted by concentration changes over time and/or space.

### 513 **6.1.3 Batch culture simulations**

514 To generate trajectories representing the time evolution of batch culture experiments, the cou-  
515 pled systems of ODEs for both models were numerically integrated using scipy's solve\_ivp  
516 function, using the Runge-Kutta method of order 5(4). The starting population sizes for the  
517 toxin-nutrient model were 0.001 (low inoculation density) and 0.004 (high inoculation density),  
518 while both the degrader and crossfeeder populations were initiated at a density of 0.01 for  
519 the degrader-crossfeeder model. Initial environmental compositions ( $r_0$ ) are indicated in the  
520 relevant figures.

### 521 **6.1.4 Microfluidic simulations**

522 Our simulations of spatially-structured flowing systems require that we move from a purely  
523 temporal model of intermediate and species changes to a spatio-temporal model. To do this,  
524 we represent the concentration profiles of the full set of intermediates as a set of 1D scalar  
525 fields  $r(x, t)$ , with the position along the channel represented by the spatial coordinate  $x$ . This  
526 varies from the inlet position  $x = 0$  to the outlet position  $x = L$ . Likewise, the profile of the  
527 species abundances  $s$  is represented by the set of 1D scalar fields  $s(x, t)$ . Implicitly, we assume  
528 that the system is small enough in the  $y$  and  $z$  dimensions that it is effectively well-mixed along  
529 these axes by diffusion, allowing us to make use of the 1D approximation to study longitudinal  
530 structure.

531 We simulate the dynamics of the media composition using the 1D advection-diffusion equa-  
532 tion:

$$\frac{\partial r(x, t)}{\partial t} = D \frac{\partial^2 r(x, t)}{\partial x^2} - v_x \frac{\partial r(x, t)}{\partial x} + R. \quad (18)$$

533 Here, on the right hand side, the first term represents the diffusive fluxes of intermediates  
534 along the length of the channel, with a rate set by the diffusion coefficient  $D = 0.5$  which we  
535 take to be equal for all intermediates. This value is high enough to ensure numerical stability  
536 of the resulting environmental trajectories. The second term represents the advective fluxes  
537 mediated by active flow, with a rate set by the flow velocity  $v_x$ . We choose values of  $v_x$  to ensure  
538 that advection dominates over diffusion given the channel length  $L$  and the diffusion coefficient  
539  $D$ , a necessary condition of our framework (Supplementary Note 2). The final term represents

540 the sources and sinks of intermediates at each position, in this case given by an adjusted form  
541 of the impact functions for the degrader-crossfeeder model (Eq. 14). Together, these terms  
542 give the total rate of change of the intermediate concentrations at a particular location in the  
543 channel. Microbial population dynamics are simulated at each spatial location and are assumed  
544 to grow statically (*i.e.* to not be transported by diffusion or flow), with local dynamics based on  
545 an adjusted form of the sensitivity functions of the degrader-crossfeeder model based on the  
546 local concentrations of intermediates (Eq. 13). We describe the necessary adjustments to the  
547 impact and sensitivity functions next, along with their implications for the calculation of the  
548 cumulative interaction.

549 As we discuss in Supplementary Note 2, application of our framework to such systems requires  
550 that the dynamics approach a steady-state. To ensure this, we make two additions to our impact  
551 and sensitivity functions. Firstly, we assume that the microbial populations can grow only to a  
552 maximal density at a given location along the device, given by the channel capacity  $\lambda = 1$ .  
553 This is applied to each population independently in order to prevent a inter-specific density  
554 dependence, which would act as a direct interaction which could not be integrated into our  
555 framework; the maximal *total* abundance at a given site is therefore equal to  $\lambda$  multiplied by the  
556 number of different populations. Both growth rates and associated impacts on concentrations  
557 of intermediates slow down as this capacity is approached. Secondly, we assume that microbes  
558 are flushed out of the system by flow at a rate  $\theta = 0.005 v_x$ , analogous to the wash-out term  
559 in chemostat models.<sup>65</sup> The dependence of this wash-out rate on the flow rate  $v_x$  is based  
560 on observations that suggest that biofilms are more strongly eroded at higher flow rates.<sup>35,70</sup>  
561 Microbial growth rates are therefore given as

$$\frac{1}{s_\alpha(x,t)} \frac{ds_\alpha(x,t)}{dt} = \frac{\lambda - s_\alpha(x,t)}{\lambda} g_\alpha(\mathbf{r}(x,t)) - \theta, \quad (19)$$

562 while the effective impact rates on the intermediates are given as

$$\frac{d\mathbf{r}(x,t)}{dt} = \sum_{\beta} \mathbf{f}_{\beta}(\mathbf{r}(x,t)) s_{\beta}(x,t) \frac{\lambda - s_{\beta}(x,t)}{\lambda}. \quad (20)$$

563 This latter expression is the explicit form of the term  $R$  in Eq. 18.

564 The introduction of this density-dependent scaling term in the dynamics of the intermediates

565 also requires an adjustment in the way the cumulative interaction is calculated. This arises  
566 because this term slows down the simulated metabolic rate of cells at high densities, reducing  
567 their effective impact on their environment. Once steady-state is achieved (Supplementary Note  
568 2), the microbial abundances and resource concentrations become dependent solely on the  
569 position in the channel ( $\mathbf{r}(x, t) \rightarrow \mathbf{r}^*(x)$  and  $\mathbf{s}(x, t) \rightarrow \mathbf{s}^*(x)$ ). The cumulative interaction from  $\beta$   
570 to  $\alpha$  is therefore given as  $\frac{1}{v_x} \int_0^x a'_{\alpha\beta}(\mathbf{r}^*) s_{\beta}^* \frac{\lambda - s_{\beta}^*}{\lambda} d\chi$ . Here,  $\chi$  acts as a variable that parameterises  
571 the spatial trajectory of the system from the inlet to the query position  $x$ , analogously to how  $\tau$   
572 parameterises the temporal trajectory of batch-culture systems in Eq. 3.

573 To ensure the simulated composition of the inflowing media remains fixed, we set  $\frac{d\mathbf{r}(x=0,t)}{dt} = 0$ .  
574 Additionally, we use an absorbing boundary condition at  $x = L$  to simulate free variation of  
575 the composition of the media at the outlet. The initial composition of the environment was set  
576 uniformly as  $\mathbf{r}(x, t = 0) = \mathbf{r}_0$ , *i.e.* equal to the composition of the inflow.

577 Both populations were seeded uniformly throughout the system at a density of  $\mathbf{s}(x, t = 0) = 0.01$ .  
578 The set of PDEs was numerically integrated using the `solve_ivp` function. We simulated dynamics  
579 for  $t = 1000$  time units until the system reached a steady-state (Fig. S7), allowing application of  
580 our theoretical framework.

|                                 |                                                                                                                                                                                                                                                                                                                                                                |                                                                                       |
|---------------------------------|----------------------------------------------------------------------------------------------------------------------------------------------------------------------------------------------------------------------------------------------------------------------------------------------------------------------------------------------------------------|---------------------------------------------------------------------------------------|
| M9 10x                          | K <sub>2</sub> HPO <sub>4</sub><br>NaCl<br>NH <sub>4</sub> Cl<br>Na <sub>2</sub> HPO <sub>4</sub>                                                                                                                                                                                                                                                              | 30 g<br>5 g<br>10 g<br>60 g                                                           |
| Metals 44 1000x                 | Na <sub>2</sub> EDTA · 2H <sub>2</sub> O<br>ZnSO <sub>4</sub> · 7H <sub>2</sub> O<br>FeSO <sub>4</sub> · 7H <sub>2</sub> O<br>MnSO <sub>4</sub> · 7H <sub>2</sub> O<br>CuSO <sub>4</sub> · H <sub>2</sub> O<br>Co(NO <sub>3</sub> ) <sub>2</sub> · 6H <sub>2</sub> O<br>Na <sub>2</sub> B <sub>4</sub> O <sub>7</sub> · 10H <sub>2</sub> O<br>H <sub>2</sub> O | 0.387 g<br>1.095 g<br>0.914 g<br>0.154 g<br>0.0392 g<br>0.0284 g<br>0.0177g<br>to 1 l |
| Hutner's mineral base (HMB) 50x | Nitric triacetic acid (NTA)<br>MgSO <sub>4</sub> · 7H <sub>2</sub> O<br>CaCl <sub>2</sub> · 2H <sub>2</sub> O<br>(NH <sub>4</sub> ) <sub>6</sub> Mo <sub>7</sub> O <sub>24</sub> · 4H <sub>2</sub> O<br>FeSO <sub>4</sub> · 7H <sub>2</sub> O<br>Metals 44 1000x<br>H <sub>2</sub> O                                                                           | 10 g<br>14.45 g<br>3.33 g<br>0.00974 g<br>0.099 g<br>50 ml<br>to 1 l                  |
| Base minimal media              | HMB 50x<br>M9 10x<br>H <sub>2</sub> O                                                                                                                                                                                                                                                                                                                          | 20 ml<br>100 ml<br>850 ml                                                             |

Table 3: Composition of base minimal media.

## 581 6.2 Experiments

### 582 6.2.1 Strains and growth conditions

583 Our *C. testosteroni* strain MWF001 comes from a pre-existing study.<sup>11</sup> Cells were streaked onto  
 584 TSA plates from freezer stocks and grown overnight. Single colonies were then picked (one  
 585 colony per biological replicate), and cells grown overnight in glass Erlenmeyer flasks under  
 586 continuous shaking in base minimal media (Table 3) supplemented with 10 mM proline. Due  
 587 to the slow growth of *C. testosteroni* under these conditions, cells were in exponential phase at  
 588 the end of this period. Cells were then washed twice in PBS. The OD<sub>600</sub>s of the washed cultures  
 589 were then measured and cultures diluted to initialise experiments at the appropriate starting  
 590 densities as described below. Cultures were grown at 28°C in all cases.

### 591 6.2.2 β-lactamase activity measurements

592 Exponential-phase cultures of *C. testosteroni* were inoculated into two Erlenmeyer flasks con-  
 593 taining 20 ml of minimal media supplemented with 5mM proline at a starting OD<sub>600</sub> adjusted to  
 594 0.00025. To one of these flasks we added ampicillin at a label concentration of 100 μg ml<sup>-1</sup>,



595 however subsequent experiments suggested that degradation of our antibiotic freezer stocks  
596 had reduced the effective concentration to  $\approx 30 \mu\text{g ml}^{-1}$ . The resulting cultures were grown  
597 under continuous shaking, and samples taken at 0, 6, 30, 54 and 78 hr. To measure the ex-  
598 tracellular  $\beta$ -lactamase activity of cultures, samples were first spun down and the supernatant  
599 pipetted off. The enzymatic activity of the supernatant was then measured using a  $\beta$ -lactamase  
600 activity assay kit (Sigma-Aldrich, MAK221). In Fig. S2, the  $\beta$ -lactamase detection limit is de-  
601 fined as two times the standard deviation of the signal estimated from sample-free control  
602 wells.

### 603 6.2.3 Intra-specific interaction measurements

604 We prepared 96-well plates with a variety of environmental conditions by filling each well with  
605  $180 \mu\text{l}$  of basal media supplemented with varying concentrations of proline ( $[\text{pro}]_0 = 0.5, 1, 2, 5$   
606 mM) and ampicillin ( $[\text{amp}]_0 = 0, 10, 20, 30 \mu\text{g ml}^{-1}$ ).  $20 \mu\text{l}$  of an exponential-phase culture of *C.*  
607 *testosteroni* was then added, with three wells of each condition containing culture adjusted to  
608 high density ( $\text{OD}_{600}$  in well =  $0.004$ ) and three wells containing culture adjusted to low density  
609 ( $\text{OD}_{600}$  in well =  $0.001$ ). The plate was placed into a plate reader (BioTek Synergy H1) and  $\text{OD}_{600}$   
610 readings for each well taken every 30 mins for 120 hr at  $28^\circ\text{C}$  under continual shaking between  
611 timepoints. The background signal was subtracted from the resulting raw growth curves by first  
612 estimating the OD contribution from the cells in the high inoculation OD wells ( $\kappa$ ) using the  
613 equation

$$\kappa = \frac{4}{3}(\langle \text{OD}_h(0) \rangle - \langle \text{OD}_l(0) \rangle), \quad (21)$$

614 where  $\langle \text{OD}_h(0) \rangle$  and  $\langle \text{OD}_l(0) \rangle$  represent the plate-wide average initial OD readings for the  
615 high inoculation density and low inoculation density wells, respectively. The factor of  $\frac{4}{3}$  stems  
616 from the 1:4 inoculation density ratio. Each curve was now individually adjusted by subtracting  
617 the average OD of the specified curve's first 3 timepoints and adding either  $\kappa$  for the high  
618 inoculation density wells or  $\frac{\kappa}{4}$  for the low inoculation density wells. The average OD curves were  
619 then calculated from the three replicates for each condition and used to calculate the abundance  
620 differences shown in Fig. 3D-G.

#### 621 **6.2.4 MIC measurements**

622 To confirm that the intrinsic resistance of *C. testosteroni* had not changed over the duration of  
623 the intra-specific interaction assay, we measured the Minimum Inhibitory Concentration (MIC)  
624 of ampicillin for each of the cultures in the 96-well plate at the end of one biological repli-  
625 cate of our experiment. Concentration gradients of ampicillin were first prepared in 96-well  
626 plates containing LB media, to which we added samples from the interaction measurement  
627 plate (specifically, from the low inoculation density wells as these were subject to the strongest  
628 selective pressure). As the  $\beta$ -lactamase resistance mechanism results in different MICs based  
629 on the starting density of culture (the inoculum effect<sup>38,39</sup>), we adjusted the inoculation volume  
630 to ensure approximately equal numbers of cells were added regardless of the final density of the  
631 cultures being measured. To do this, we took advantage of the fact that the final density of the  
632 samples was directly proportional to the initial proline concentration  $[\text{pro}]_0$  (Fig. S5A), allowing  
633 us to simply scale the inoculation volume by  $[\text{pro}]_0$ . Specifically, we used 20  $\mu\text{l}$  of  $[\text{pro}]_0 = 0.5$   
634 mM cultures, 10  $\mu\text{l}$  of  $[\text{pro}]_0 = 1$  mM cultures, 5  $\mu\text{l}$  of  $[\text{pro}]_0 = 2$  mM cultures and 2  $\mu\text{l}$  of  $[\text{pro}]_0 = 5$   
635 mM cultures. These inocula resulted in starting densities around 10 times greater than those  
636 of the interaction assay, explaining why the resulting MICs were substantially higher than the  
637 values of  $[\text{amp}]_0$  used during interaction measurements. The total volume in each well was fixed  
638 at 200  $\mu\text{l}$ . Plates were incubated at 28°C under continuous shaking. Final MICs were defined  
639 as the lowest concentration of ampicillin at which the OD<sub>600</sub> of a given sample was reduced by  
640 at least 80% relative to an antibiotic-free control after 20 hrs.

641 **7 Figures**

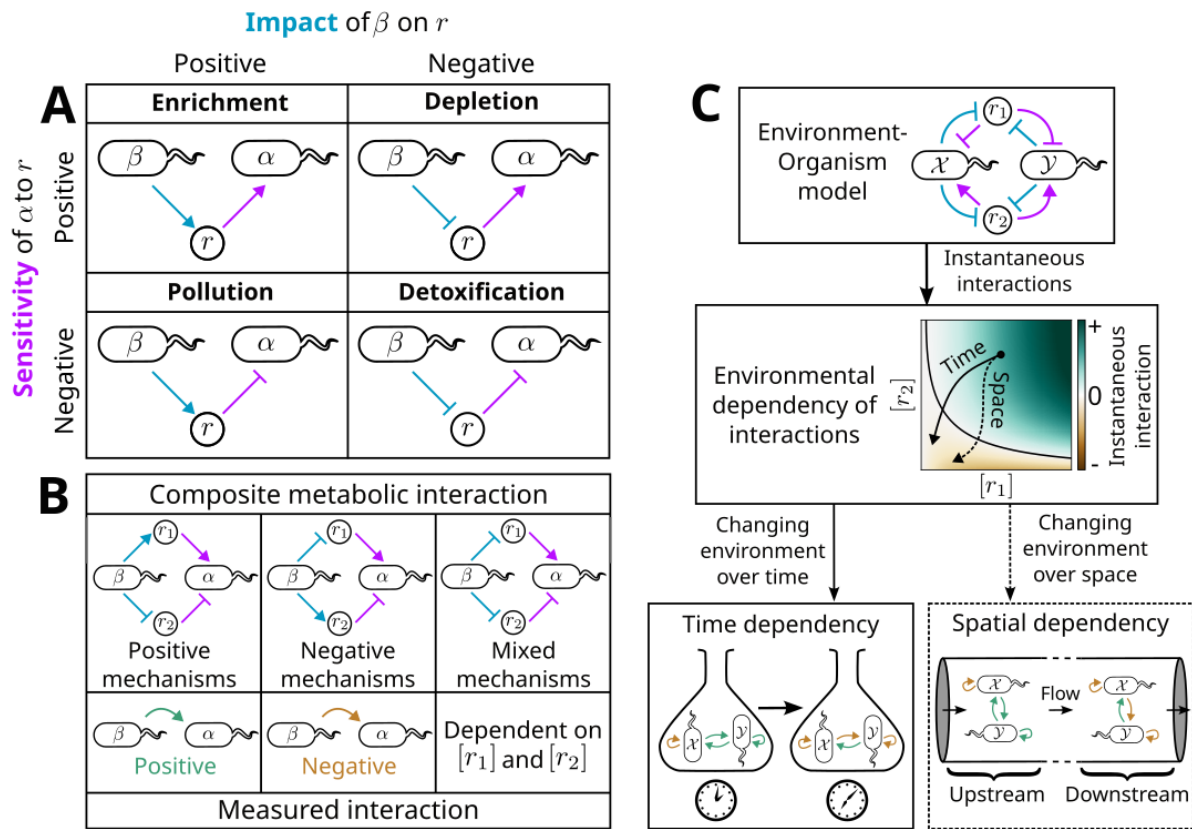

**Figure 1: Multiple interaction context-dependencies are explained with a single theoretical framework.** **A** Indirect interactions between organisms - those mediated by changes in the abundance of intermediates - can be broken into elementary components by considering the role of each intermediate  $r_\rho$  separately. The ‘sensitivity function’ of a target species  $\alpha$  with respect to a given intermediate  $r$  (purple) denotes the effect of  $r$  on the growth rate of  $\alpha$  (i.e. whether it is a toxin – bar – or nutrient – arrow), while the ‘impact function’ of an effector species  $\beta$  with respect to  $r$  (blue) denotes the effect of  $\beta$  on the abundance of  $r$  (i.e. whether it is produced – arrow – or consumed – bar). Combinations of the signs of these functions imply four elementary metabolic interaction types: enrichment and detoxification which enhance the growth of the impacted species  $\alpha$ , and depletion and pollution which reduce  $\alpha$ ’s growth.<sup>22,37</sup> **B** These can be combined to generate composite metabolic interactions, with the sign of the measured interaction depending on the individual effects of the composed elementary metabolic interactions. In cases where the elementary interactions have a mixture of positive and negative growth rate impacts, the measured interaction will depend on the relative concentrations of the intermediates - i.e. the environmental context. **C** Our theoretical framework shows how Environment-Organism (EO) models in which such indirect interaction mechanisms are explicitly represented give rise to an instantaneous interaction that depends on the environment. As the environment changes over time (e.g. in batch culture) or over space (e.g. in microfluidic channels at steady-state), this environmental dependency in turn gives rise to time and spatial dependencies.

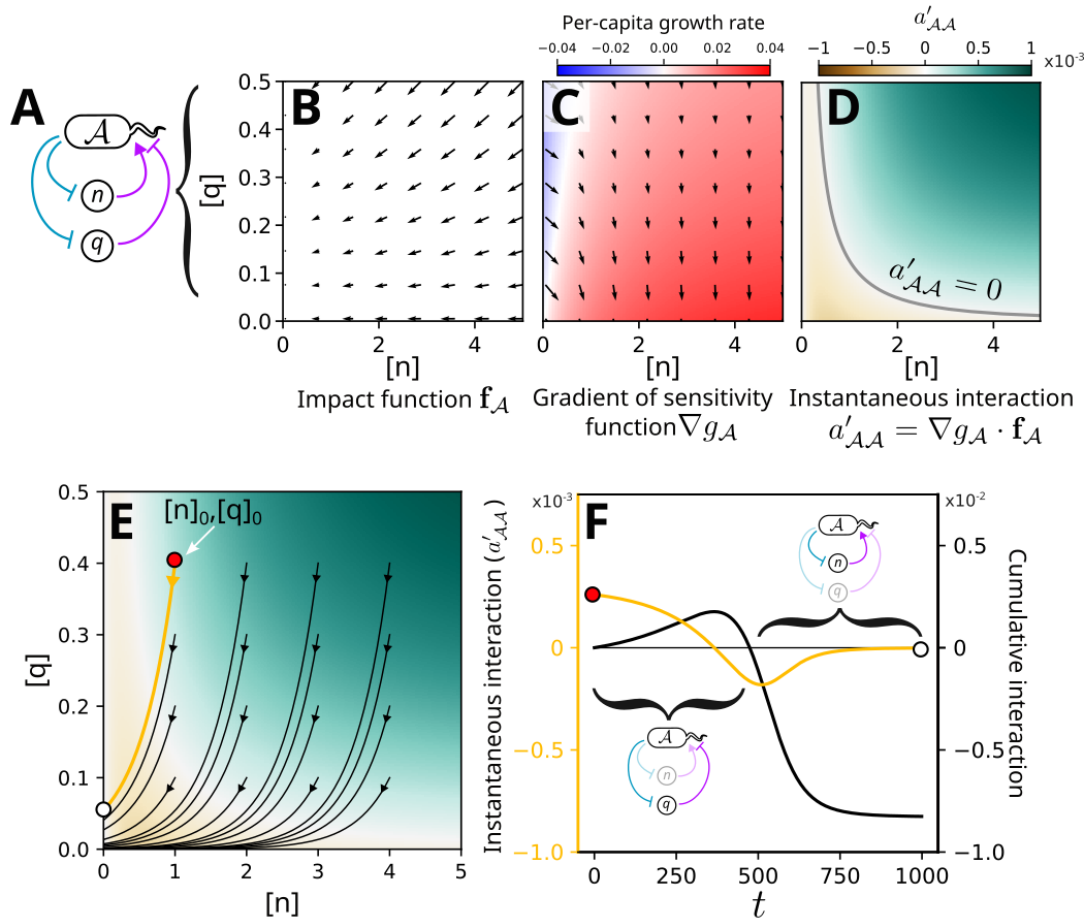

**Figure 2: Intra-specific interactions mediated by mixtures of positive and negative mechanisms are predicted to switch sign over time in batch culture.** **A** One of the simplest examples of a system with mixed pairwise elementary interactions is a single species  $\mathcal{A}$  which increases the growth of other members of its population by detoxifying an environmental toxin while reducing their growth by depleting a common nutrient. **B, C** We can represent the impact and sensitivity functions for  $\mathcal{A}$  using the ‘environment space’, which denotes the concentrations of the different intermediates in the system (in this case, the concentrations of the nutrient  $[n]$  and of the toxin  $[q]$ ). Impact functions are vector fields sitting in this space (black arrows, **B**), while sensitivity functions are scalar fields (**C**). The gradient of the sensitivity function then represents the direction in the environment space in which the growth rate of  $\mathcal{A}$  increases most rapidly, as well as how quickly it increases (black arrows, **C**). **D** Taking the scalar product of the impact function and the gradient of the sensitivity function yields the instantaneous interaction  $a'_{\mathcal{A}\mathcal{A}}$ , representing the instantaneous effect that  $\mathcal{A}$  has on its own growth rate at a given position in the environment space. **E** Closed systems such as batch culture experiments trace out trajectories in this environment space, starting from an initial position  $[n]_0, [q]_0$ . **F** We can calculate both  $a'_{\mathcal{A}\mathcal{A}}$  and the integrated effect of  $\mathcal{A}$  on its own growth (main text), demonstrating a switch in the effective intra-specific interaction: at early timepoints, when the toxin concentration is high, detoxification dominates and the interaction appears positive. By contrast, at late timepoints when the toxin has mostly been removed, depletion of the single nutrient dominates and the instantaneous intra-specific interaction becomes negative.

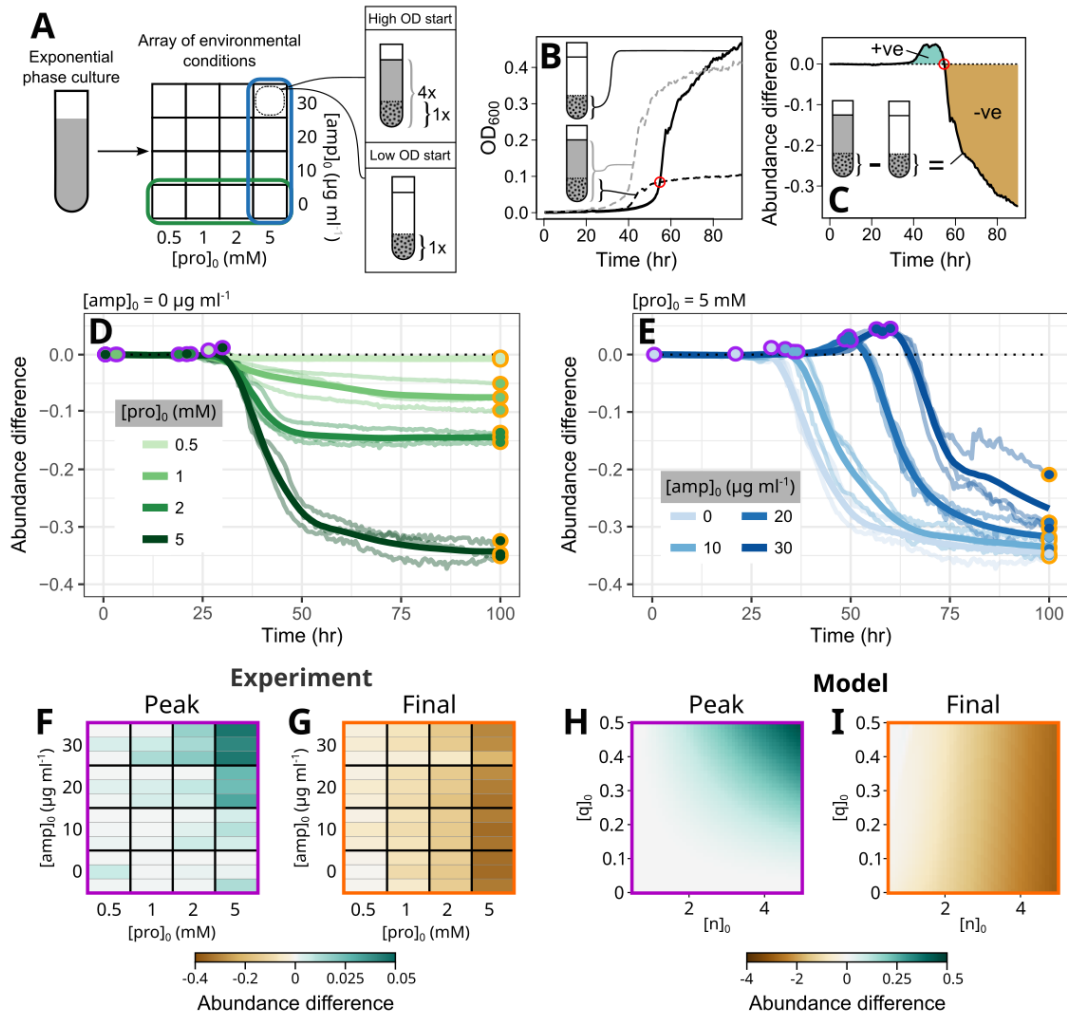

**Figure 3: An antibiotic-based model system demonstrates sign switching of measured intra-specific interactions over time.** *Comamonas testosteroni* is a  $\beta$ -lactamase producing soil bacterium which can degrade environmental ampicillin. Combined with competition over a single limiting carbon source (proline), we used this as an experimental analogue of the model shown in Fig. 2. **A** Exponential-phase cells were transferred to a 96-well plate containing wells with different initial ampicillin concentrations  $[amp]_0$  and proline concentrations  $[pro]_0$ . Six wells were prepared for each condition, consisting of three replicates each of low and high initial inoculation densities at a 1:4 density ratio. **B, C** We measured the growth curve of each well and averaged the technical replicates. We then calculated the abundance difference over time by normalising the averaged high OD curve by the ratio of the starting ODs (**B**) and subtracting the low OD curve (main text, Fig. S1) (**C**). Abundance differences greater than 0 indicate that growth of a matched sub-population of *C. testosteroni* (black dots) was enhanced by the presence of additional members of the same species in the high-OD wells relative to the low-OD wells (a positive intra-specific interaction), while differences less than 0 indicate growth suppression (a negative intra-specific interaction). **D, E** Comparing abundance differences across different proline (**D**) and ampicillin (**E**) concentrations demonstrates the environment-dependent shift in positive to negative interactions predicted by the model. We summarise this shift for each condition by measuring the peak (purple circles) and final (orange circles) abundance difference for each condition (**F, G**). **H, I** These qualitatively match predictions from our modelling framework. The general pattern that emerges from these simulations is robust to changes in simulation parameters (Fig. S4). Faint lines in **D** indicate  $n = 3$  separate biological replicates performed on separate days, while bold lines indicate LOESS-smoothed averages. Biological replicates are indicated in **F** and **G** by separate horizontal strips.

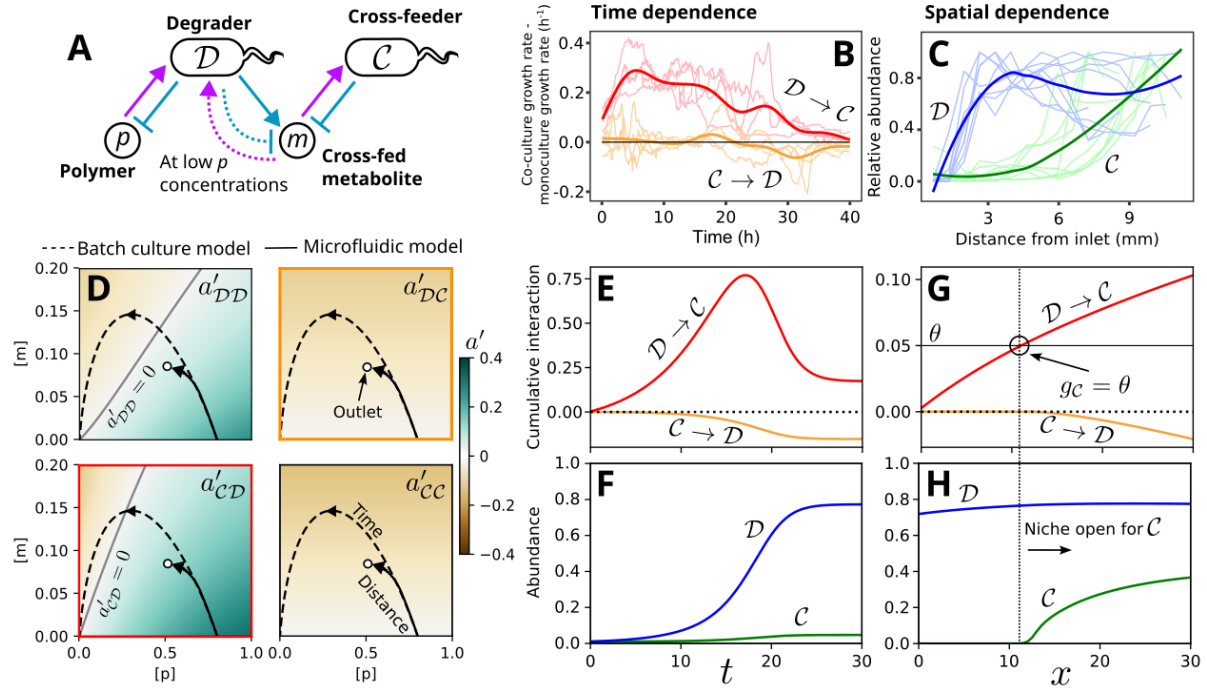

**Figure 4: Our framework shows that interaction time dependencies and spatial structure can arise from closely-related processes.** **A** Two recent studies<sup>33,35</sup> describe the ecological patterns arising in a two-species community consisting of a degrader  $D$  that consumes a polymer  $p$  and produces a metabolic by-product  $m$  which is consumed by a second crossfeeding species ( $C$ ). At low concentrations of  $p$ ,  $D$  switches from net production of  $m$  to consumption. **B** Daniels et al.<sup>33</sup> find that this type of community displays time-dependent inter-specific interactions in batch culture, with the impact of  $D$  on  $C$  increasing early on and decreasing later (red) and the impact of  $C$  on  $D$  switching from neutral to negative (orange). **C** By contrast, Wong et al.<sup>35</sup> show how a similar community patterns itself in microfluidic channels with unidirectional flow, with  $C$  only being able to grow towards the outlet of the device. **D** We constructed an EO model of this community and applied our analytical techniques to obtain the instantaneous interaction matrix for each possible pair of community members (main text, methods). We then simulated the environmental trajectories of batch culture (dashed lines) and the microfluidic device (solid lines) inoculated with this community (methods). In the case of the microfluidic device, the initial environment  $[p]_0, [m]_0$  corresponds to the composition of the media injected into the system at the inlet, while points along the environmental trajectory indicate the steady-state media composition at different positions along the channel. **E, F** In the batch-culture model, the gradual enhancement of the environment by  $D$  for  $C$  via conversion of  $p$  to  $m$  results in a gradual increase in the cumulative interaction from  $D$  to  $C$ . Later, once  $p$  has been largely exhausted, the switch in the behaviour of  $D$  from net production to net uptake of  $m$  leads to competition between the two species, and a downward trend in both inter-specific cumulative interactions (**E**). These dynamics are difficult to dissect from the raw growth curves (**F**). **G, H** When this community is placed into the spatial context of a simulated microfluidic channel, we observe a similar interaction pattern from the inlet to the outlet, with a positive interaction accumulating from  $D$  to  $C$ . At a certain position, this positive cumulative interaction exceeds the mortality rate  $\theta$  representing the flushing of cells by flow. Beyond this point, the net growth rate of  $C$  is positive, reflecting the opening of a niche for  $C$  (**G**). This leads to the spatial structuring of the two species observed in experiments (**H**).



## 642 8 Supplementary Notes

### 643 8.1 Supplementary Note 1: Derivation of the cEO equation

644 To obtain our expression for the per-capita growth rate of a species  $\alpha$  in a closed Environment-  
 645 Organism system (Eq. 3), we begin from our definitions of the impact and sensitivity functions  
 646 (Eqs. 1 and 2). We assume that the system sweeps out some trajectory  $\Gamma$  in the environment  
 647 space which can be parameterized by the variable  $\tau$ .  $\tau$  can be interpreted as representing the  
 648 history of the system up to the current query time  $t$ . At  $\tau = 0$ , the system begins at an initial  
 649 position  $\mathbf{r}_0$  in the environment space, while at  $\tau = t$  it has reached an end position  $\mathbf{r}(t)$ . We  
 650 seek to express the per-capita growth rate at this query time.

651 By our definition of the sensitivity function, we have

$$\frac{1}{s_\alpha} \frac{ds_\alpha}{dt} = g_\alpha(\mathbf{r}). \quad (22)$$

652 From the gradient theorem, we can rewrite this as

$$g_\alpha(\mathbf{r}) = g_\alpha(\mathbf{r}_0) + \int_{\Gamma} \nabla g_\alpha(\mathbf{r}) \cdot d\mathbf{r}, \quad (23)$$

653 where the second term is the path integral of the gradient of the sensitivity function over the  
 654 trajectory  $\Gamma$ . We can use the definition of a path integral over a vector field to express this  
 655 as

$$\begin{aligned} \int_{\Gamma} \nabla g_\alpha(\mathbf{r}) \cdot d\mathbf{r} &= \int_0^t \nabla g_\alpha(\mathbf{r}) \cdot \frac{d\mathbf{r}}{d\tau} d\tau \\ &= \int_0^t \nabla g_\alpha(\mathbf{r}) \cdot \left( \boldsymbol{\sigma} + \sum_{\beta} \mathbf{f}_\beta(\mathbf{r}) s_\beta \right) d\tau \\ &= \int_0^t \nabla g_\alpha(\mathbf{r}) \cdot \boldsymbol{\sigma} d\tau + \sum_{\beta} \int_0^t \nabla g_\alpha(\mathbf{r}) \cdot \mathbf{f}_\beta(\mathbf{r}) s_\beta d\tau. \end{aligned} \quad (24)$$

656 We find the term  $\nabla g_\alpha(\mathbf{r}) \cdot \mathbf{f}_\beta(\mathbf{r})$  naturally arising in this expression. Calling this  $a'_{\alpha\beta}(\mathbf{r})$ , we can  
 657 put together our final expression for open ecosystems:

$$\frac{1}{s_\alpha} \frac{ds_\alpha}{dt} = g_\alpha(\mathbf{r}_0) + \int_0^t \nabla g_\alpha(\mathbf{r}) \cdot \boldsymbol{\sigma} d\tau + \sum_\beta \int_0^t a'_{\alpha\beta}(\mathbf{r}) s_\beta d\tau. \quad (25)$$

658 For closed systems, we can assume that  $\boldsymbol{\sigma} = \mathbf{0}$ , thus we obtain the cEO equation:

$$\frac{1}{s_\alpha} \frac{ds_\alpha}{dt} = g_\alpha(\mathbf{r}_0) + \sum_\beta \int_0^t a'_{\alpha\beta}(\mathbf{r}) s_\beta d\tau. \quad (26)$$



## 659 **8.2 Supplementary Note 2: Use of the EO framework to model systems under** 660 **flow**

661 In using our EO framework to simulate the dynamics of systems subject to flow, we need to be  
662 careful to specify the conditions under which our closed-system assumption ( $\sigma = 0$ ) holds true.  
663 Indeed, by having an inlet into which fresh nutrients can be continuously fed, this assumption  
664 would seem to be grossly violated by such systems. However, we can consider a fluid parcel  
665 travelling along the length of the system to behave as a closed system (in the sense that changes  
666 to its composition are only mediated by the local microbial populations at position  $x$ ) as long  
667 as the rate of flow is large relative to the diffusion rate of intermediates.

668 We can show this formally by beginning with the 1D advection-diffusion equation used to specify  
669 the evolution of the distribution of intermediates along the system over time (Eq. 18):

$$\frac{\partial \mathbf{r}(x, t)}{\partial t} = D \frac{\partial^2 \mathbf{r}(x, t)}{\partial x^2} - v_x \frac{\partial \mathbf{r}(x, t)}{\partial x} + R. \quad (27)$$

670 We proceed by making two assumptions: firstly, we assume that the system reaches a steady-  
671 state concentration profile  $\mathbf{r}^*(x)$  (associated with a static distribution of species  $s^*(x)$ ), allowing  
672 us to set this equation to zero. Secondly, we assume that the Péclet number  $Pe$ , which is  
673 defined as the ratio of the advective to diffusive transport rates, is substantially greater than 1.  
674 This allows us to neglect the diffusive term in the advection-diffusion equation. We therefore  
675 obtain

$$v_x \frac{d\mathbf{r}^*(x)}{dx} = R = \sum_{\beta} s_{\beta}^*(x) \mathbf{f}_{\beta}(\mathbf{r}^*(x)). \quad (28)$$

676 We note the similarity of this expression to our original definition of the rate of change of the  
677 environment in a batch culture system (Eq. 1). We can match these two expressions exactly  
678 by noting that  $v_x = \frac{dx}{dt}$  and reparameterising the environmental trajectory  $\mathbf{r}^*(x)$  in terms of the  
679 time coordinate of a fluid parcel relative to the time of its emergence at the inlet ( $x = 0$ ). We  
680 can use this same reparameterisation to write Eq. 2 in terms of the steady-state concentration  
681 profile as traversed by the fluid parcel. These can finally be combined together to obtain a  
682 spatial version of Eq. 3, and a corresponding definition of the cumulative interaction (Methods).  
683 Thus, as long as we can justify the two original assumptions, our framework should be directly

684 applicable to such systems.

685 Beginning with the assumption that the system approaches a stationary distribution, we show in  
686 Fig S7 the environmental trajectories traced out along the length of the channel as a function of  
687 increasing simulated time. We observe, as expected, convergence on a static distribution  $r^*(t)$   
688 over long timescales. It is difficult to define precise criteria under which this convergence will  
689 occur for general EO models, but a necessary condition is that the sensitivity functions  $g_\alpha$  must  
690 contain a negative mortality term against which positive growth rates can be balanced in the  
691 long term. In our model, this is provided by  $\theta$ , which describes the rate at which cells are washed  
692 off the surface of the channel by flow. An additional factor which we have found to be important  
693 is the inclusion of a density-dependent mechanism for capping growth at a particular spatial  
694 location, given in our case by the capacity  $\lambda$ . In the absence of this, species that are able to  
695 grow on the source media simply accumulate indefinitely at the inlet, rather than spreading out  
696 along the channel. Addition of these elements requires an adjustment to how the cumulative  
697 interaction is calculated, which we specify in the methods (section 6.1.4).

698 Now turning to  $Pe$ , we note that it is defined as  $Pe = \frac{Lv_x}{D}$ , where  $L$  is the characteristic length-  
699 scale of the system (in this case, the length of the channel). We can readily obtain approximate  
700 values for the diffusion constants of dextran and glucose (approximately  $3 \times 10^{-8} \text{ cm}^2 \text{ s}^{-1}$  and  
701  $5 \times 10^{-6} \text{ cm}^2 \text{ s}^{-1}$ , respectively). Furthermore, in the experiments described in Wong et al. <sup>35</sup>,  
702  $L = 2 \text{ cm}$  and  $v_x$  varied between  $0.0003 \text{ cm s}^{-1}$  and  $0.003 \text{ cm s}^{-1}$ . This gives us a range of  $Pe$  be-  
703 tween 120 and 200,000, both substantially higher than 1 and firmly placing these experiments in  
704 the advection-dominated regime. We have also chosen the equivalent model parameters such  
705 that  $Pe$  varies between 75 and 1200, similarly placing the model in the advection-dominated  
706 regime.

707 **9 Supplementary Figures**

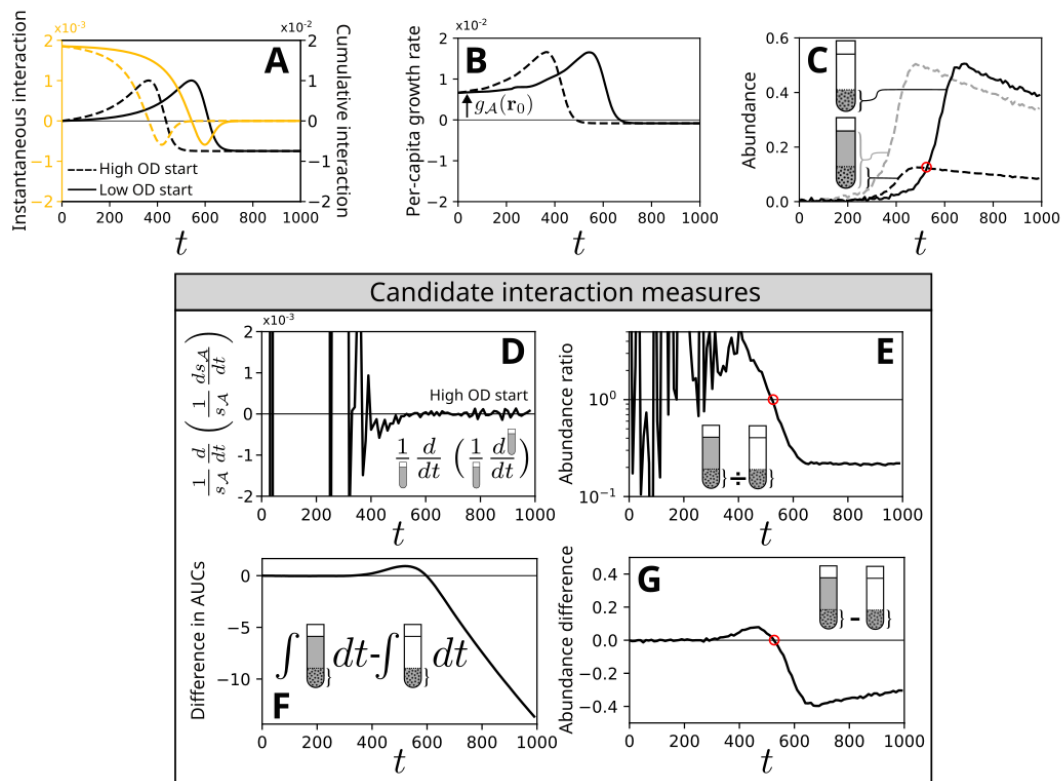

**Figure S1: Simulated batch cultures show abundance differences capture time-dependent interactions.** **A** We illustrate the relationship between the instantaneous, cumulative and measured intra-specific interactions for the toxin-nutrient system by simulating batch cultures initialised at high and low inoculation densities (compare Fig. 2F). **B** The per-capita growth rate of cells in each of these populations is given by adding a constant  $g_A(r_0)$  – representing the growth rate of  $A$  in the initial environment  $r_0$  – to the cumulative interaction. **C** Integration of the per-capita growth rate yields growth curves for the two conditions. Here, normally distributed noise (s.d. = 0.005) has been added to simulate measurement noise. As in Fig. 3C, we measure the size of the sub-population in the high starting-density condition (black dashed line) matched to the low starting-density population (black solid line) by dividing the high-density growth curve (gray dashed line) by the ratio of inoculation densities. **D** One option to estimate interactions from these growth curves is to calculate the quantity  $\frac{1}{s_A} \frac{d}{dt} \left( \frac{1}{s_A} \frac{ds_A}{dt} \right)$  (shown for the high inoculation-density population), which from the cEO equation is expected to return the instantaneous intra-specific interaction for monocultures. **E** Alternatively, the ratio between the sub-populations over time indicates whether the sub-population in the high starting-density culture has grown more (positive interaction) or less (negative interaction) than that in the low starting-density culture.<sup>9,10,41</sup> While both of these approaches work in principle, in practice measurement noise is so strongly amplified at early time points when abundances are small that useful information cannot be reliably extracted. **F** The difference between the areas under the growth curves (AUCs) from the beginning of the experiment up to a query time is another alternative.<sup>11,12</sup> This captures the shape of the intra-specific interaction initially, but fails to stabilise once the cumulative interaction stops changing. **G** The abundance difference<sup>13</sup> displays low initial noisiness and long-term stability while also capturing the overall shape of the cumulative interaction, and is the primary experimental interaction measurement we use in this manuscript.

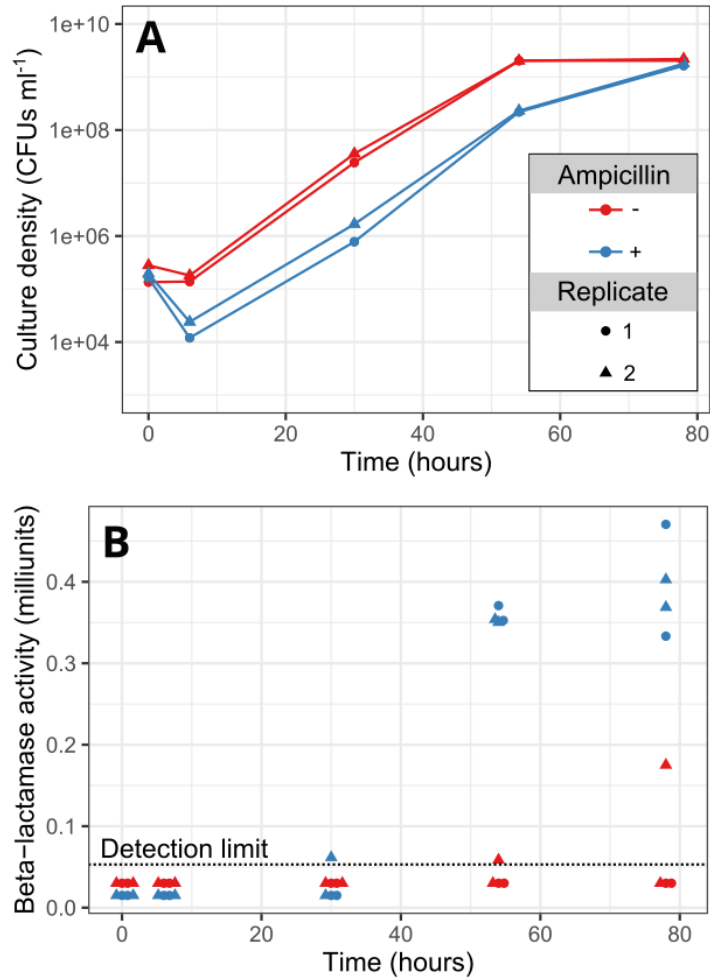

Figure S2: ***C. testosteroni* secretes  $\beta$ -lactamases when grown with ampicillin.**  $n = 2$  cultures of *C. testosteroni* initialised from separate colonies were grown in media containing 5 mM proline and either with (blue) or without (red) ampicillin. Samples were taken from cultures at the indicated timepoints and cell densities (**A**) and  $\beta$ -lactamase activities (**B**) measured. One unit of  $\beta$ -lactamase is defined as the amount of enzyme needed to hydrolyse 1 nmol of nitrocefin in 1 ml of solution in 1 minute. Points with equal shapes and colours in **B** indicate  $n = 2$  technical replicates of the  $\beta$ -lactamase assay performed on the same *C. testosteroni* culture at the same time.

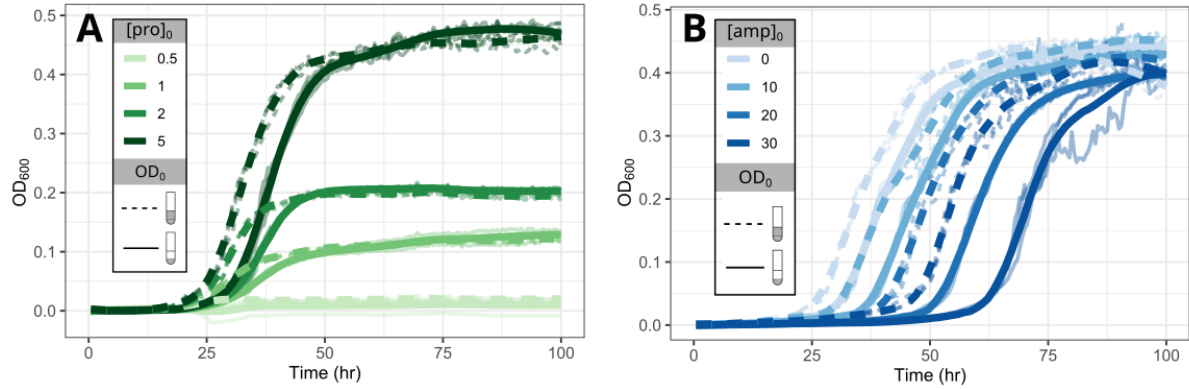

Figure S3: **Raw *C. testosteroni* growth curves under varying environmental conditions.** Raw growth curves (faint lines,  $n = 3$  technical replicates for each condition) and cross-condition LOESS-smoothed averages (bold lines) for one biological replicate of the experiment shown in Fig. 3. Dashed lines indicate cultures inoculated at high OD, while solid lines indicate cultures inoculated at low OD. **A** All samples for which  $[\text{amp}]_0 = 0$ , representing the antibiotic-free control samples. **B** All samples for which  $[\text{pro}]_0 = 5\text{mM}$ .

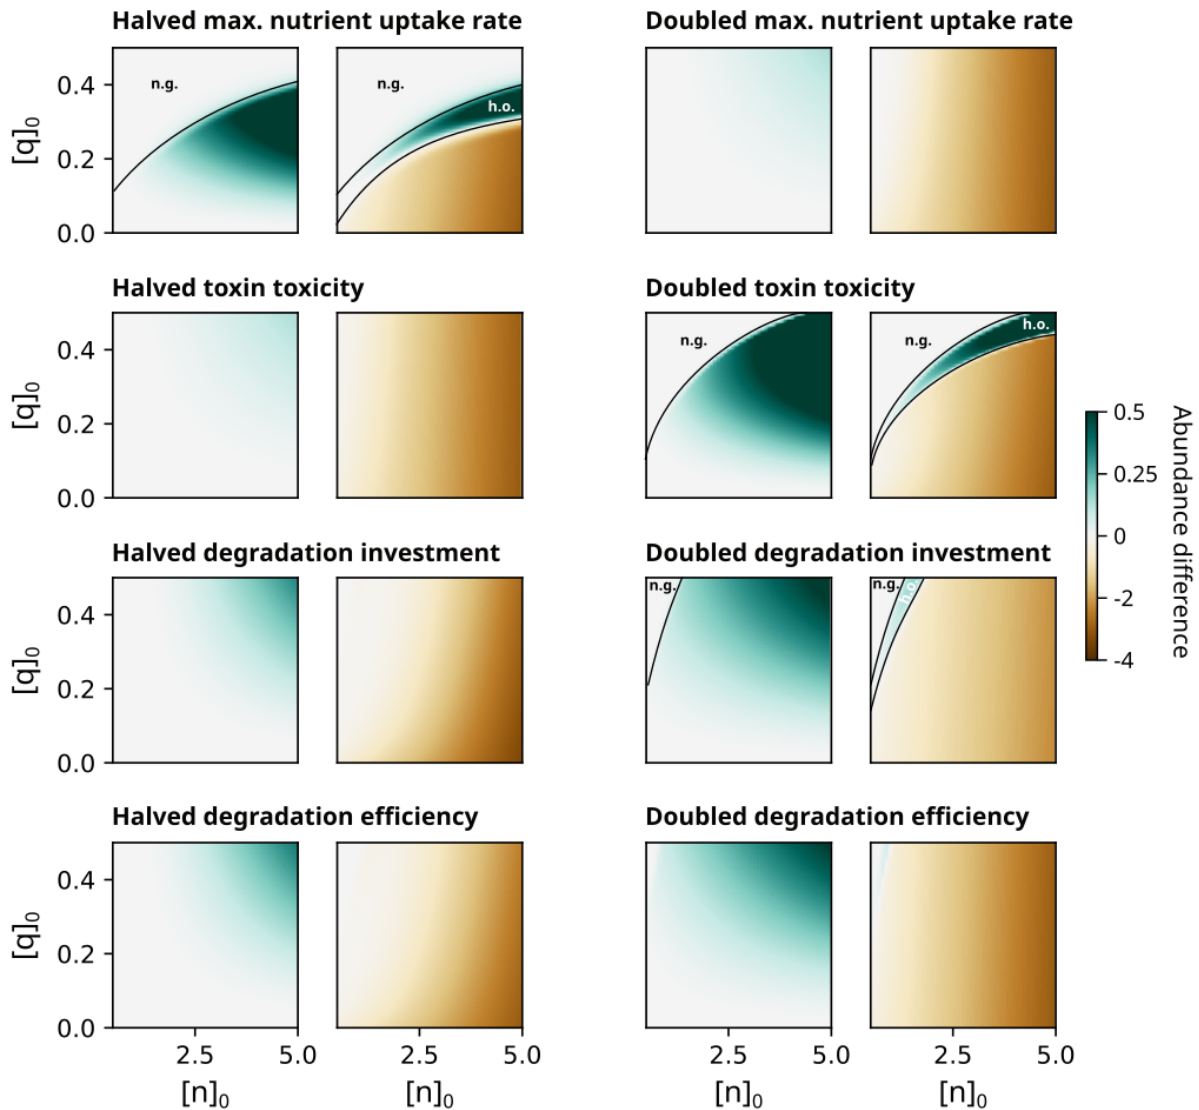

**Figure S4: Large shifts in the parameters of the toxin-nutrient model do not substantially impact the qualitative interaction patterns observed.** To investigate the robustness of the time-dependent interaction patterns observed in our toxin-nutrient model (Fig. 3H,I), we repeated our simulations with doubled and halved maximum nutrient uptake rate ( $\nu_n$ , top), maximal toxin impact ( $\nu_q$ , top-middle), toxin degradation investment ( $f$ , bottom-middle) and detoxification efficiency ( $\delta$ , bottom). In the case of doubled  $\nu_q$  and halved  $\nu_n$ , we observe that in some environments with high toxin concentrations and low nutrient concentrations either only cells in the high inoculation OD conditions are able to grow (denoted ‘h.o.’) or that there is no growth for either inoculation density (denoted ‘n.g.’).

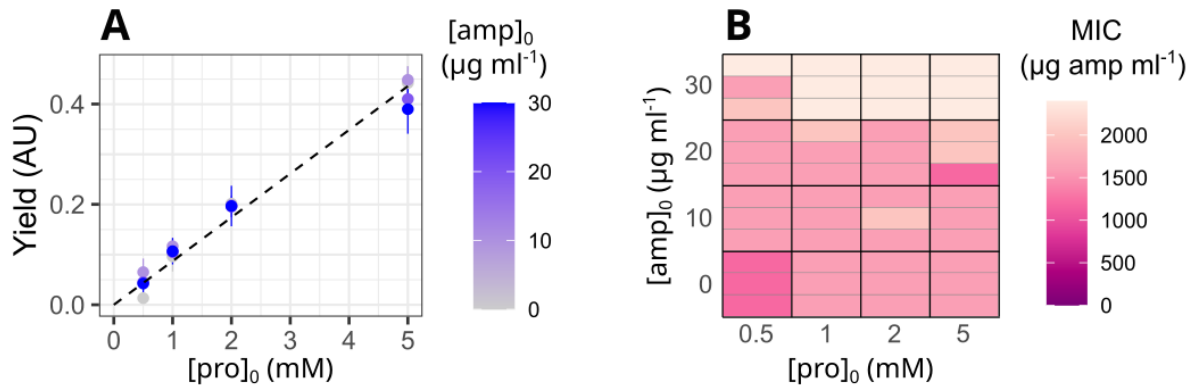

Figure S5: ***C. testosteroni* evolves stronger  $\beta$ -lactam resistance over experimental timescales.** Following one biological replicate of the experiment shown in Fig. 3, the minimum inhibitory concentration (MIC) of ampicillin was measured for each of the 48 low inoculation density wells (Methods). To prevent the inoculum effect from influencing our measurements,<sup>38,39</sup> we scaled the inoculation volume of culture by the concentration of proline in the environment. **A** This is directly proportional to the final yield of *C. testosteroni*, shown here as the OD measurement at 100 hours. This procedure thus ensured that the inoculated population size was approximately constant. **B** Heatmap showing the MIC of ampicillin measured for each environmental condition. For each condition, we show the result for each technical replicate as a separate horizontal strip.

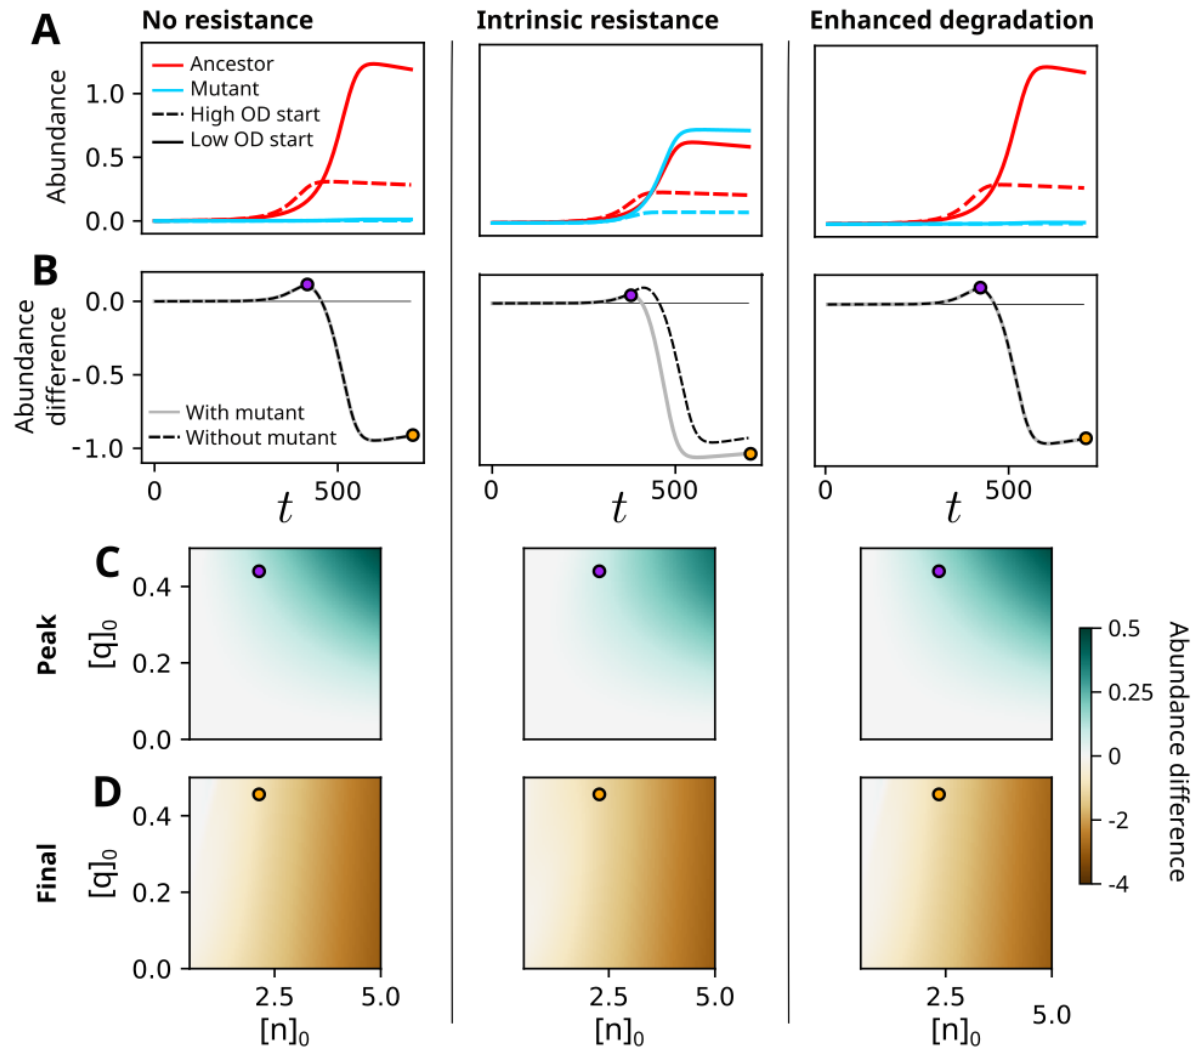

Figure S6: **Evolution of toxin resistance attenuates measured positive interaction strengths.** To investigate the effect of evolution of toxin resistance on interaction measurements in our toxin-nutrient system, we performed batch culture simulations in which an ancestral population was co-cultured with a small population (1 %) of mutant cells with either the same properties as the ancestral population (left), 5x stronger intrinsic resistance ( $\nu_q/5$ , middle) or 5x more efficient toxin degradation ( $5\delta$ , right). **A** We show raw simulated abundance curves of the ancestral (red) and mutant (blue) populations when inoculated at high (dashed lines) and low (solid lines) densities. To assist comparisons, high inoculation density curves have been normalised by the inoculation ratio (compare Fig. 3B). **B** From these, we calculate time-dependent abundance differences between the total population sizes (sum of ancestral and mutant populations) in the high and low inoculation density conditions (grey lines, compare Fig. 3C). By comparing to a null model in which only the ancestral population is present (black dashed lines), we see that only the mutant with an increase in intrinsic resistance influences the measured interaction, weakly reducing the strength of the positive phase of the measurement. **C,D** This conclusion is supported by comparing the peak (C) and final (D) abundance differences across multiple environments (compare Fig. 3H,I). Purple and orange points indicate the initial environmental composition of the simulations shown in A and B.



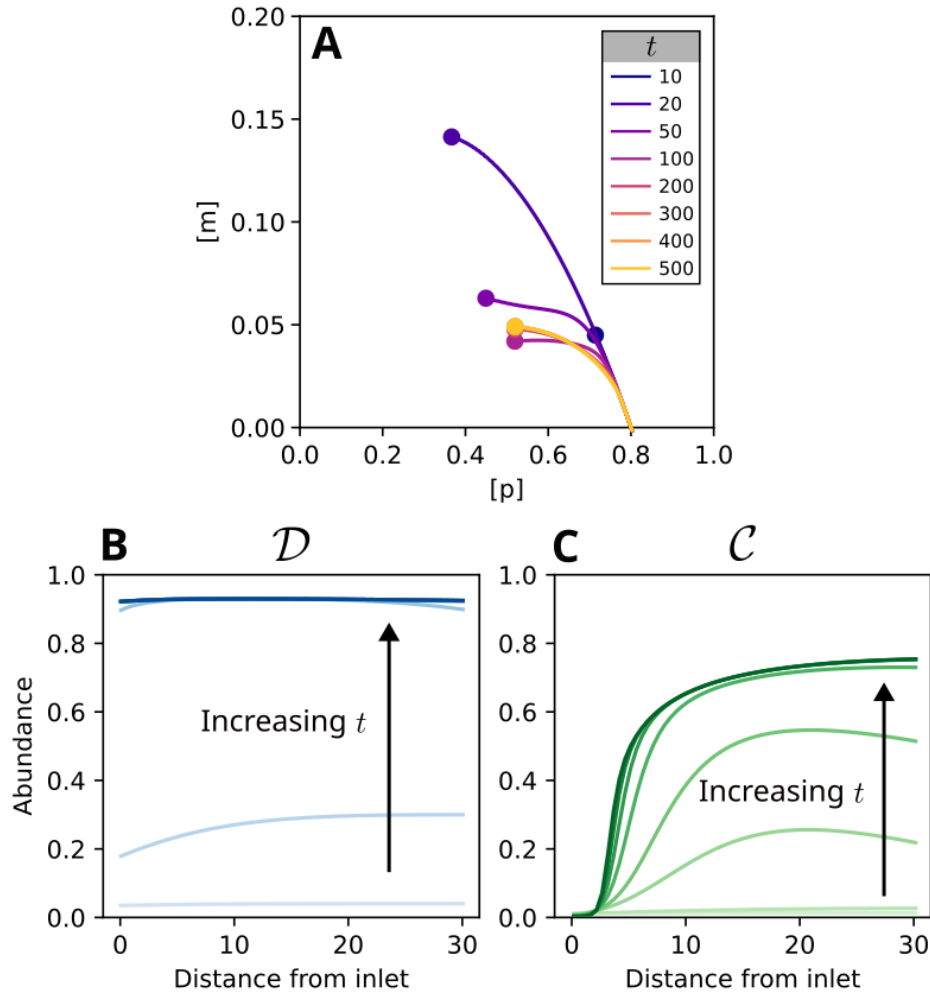

**Figure S7: Our spatial model of a microfluidic channel stabilises over long timescales.**

An assumption necessary for our framework to be applied to spatially varying environments is that the composition of the environment is static (Supplementary Note 2). **A** To confirm this condition was met in our model of the microfluidic channel at long timescales, we plotted the trajectories representing the spatially-varying environment after different simulation lengths ( $t$ ) when the flow velocity  $v_x = 2.5$ . These sweep out a curve from the position representing the inlet composition ( $[p]_o = 0.8, [m]_o = 0$ ) to the composition at the outlet (circular points). After an initial transient during community establishment, we observe that the environmental trajectory traces out a consistent curve beyond  $t = 200$ . **B, C** This stabilisation of the environment corresponds to a stabilisation of the spatial structure of the community, as shown by the changing distribution of the degrader (**B**) and cross-feeder (**C**) along the length of the channel over time. Increasingly dark shades of blue and green in these plots indicate later sampling times of the simulation and correspond to the same sampling times in panel A. All other microfluidic simulations in this manuscript are sampled at  $t = 1000$ .

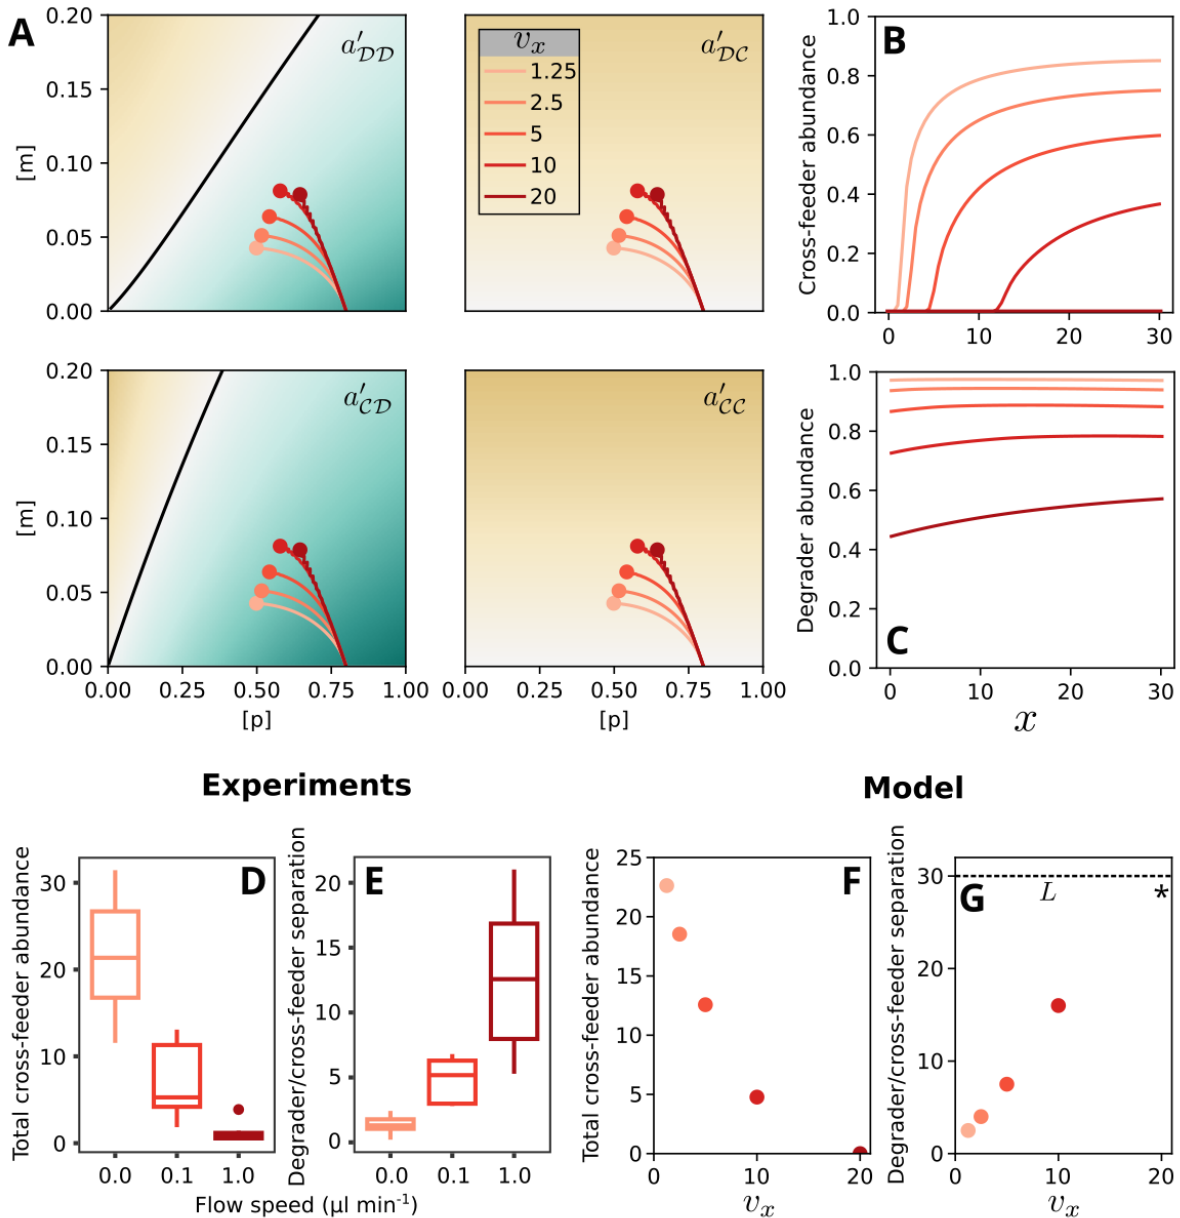

**Figure S8: Changes in the spatial structure of simulated microfluidic communities under varying flow speeds match experimental observations.** **A** Variation of the flow speed  $v_x$  in simulated microfluidic channels results in different environmental trajectories swept out along the length of the system. Here we plot the resulting steady-state environmental trajectories on top of the instantaneous interaction maps for the degrader  $\mathcal{D}$  and crossfeeder  $\mathcal{C}$  species (Fig. 4D). These curves represent the variation in the composition of the environment from the inlet ( $[p]_0 = 0.8$ ,  $[m]_0 = 0$ ) to the outlet (circular points). **B**, **C** These different trajectories, combined with variations in the wash-out rate  $\theta$  induced by different flow rates, result in different spatial structuring of the cross-feeder (**B**) and the degrader (**C**) along the length of the device. **D**, **E** The impact of flow rate on the total abundance of the cross-feeder (**D**, replotted from Wong et al. <sup>35</sup>) and the spatial separation between the the degrader and the cross-feeder growth zones (**E**, replotted from Wong et al. <sup>35</sup>) were previously quantified experimentally. **F**, **G** We evaluated these quantities from the steady-state species abundance profiles from our model, finding identical trends as in the experiments. The dashed line in **G** indicates the channel length  $L$ . As we do not observe growth of the crossfeeder in the highest flowrate simulation, we indicate that the separation between the degrader and crossfeeder growth zones is not defined for this simulation with an asterisk.

## 708 **References**

- 709 [1] Pringle, E. G. *PLOS Biology* **2016**, *14*, e2000891.
- 710 [2] Lidicker, W. Z. *BioScience* **1979**, *29*, 475–477.
- 711 [3] Allesina, S.; Tang, S. *Nature* **2012**, *483*, 205–208.
- 712 [4] Novak, M.; Yeakel, J. D.; Noble, A. E.; Doak, D. F.; Emmerson, M.; Estes, J. A.; Jacob, U.;  
713 Tinker, M. T.; Wootton, J. T. *Annual Review of Ecology, Evolution, and Systematics* **2016**,  
714 *47*, 409–432.
- 715 [5] Paine, R. T. *Nature* **1992**, *355*, 73–75.
- 716 [6] Gonze, D.; Coyte, K. Z.; Lahti, L.; Faust, K. *Current Opinion in Microbiology* **2018**, *44*, 41–49.
- 717 [7] van den Berg, N. I.; Machado, D.; Santos, S.; Rocha, I.; Chacón, J.; Harcombe, W.; Mitri, S.;  
718 Patil, K. R. *Nature Ecology and Evolution* **2022**, *6*, 855–865.
- 719 [8] Palmer, J. D.; Foster, K. R. *Science* **2022**, *376*, 581–582.
- 720 [9] Vos, M. G. D.; Zagorski, M.; McNally, A.; Bollenbach, T. *Proceedings of the National Academy*  
721 *of Sciences of the United States of America* **2017**, *114*, 10666–10671.
- 722 [10] Hsu, R. H.; Clark, R. L.; Tan, J. W.; Ahn, J. C.; Gupta, S.; Romero, P. A.; Venturelli, O. S. *Cell*  
723 *Systems* **2019**, *9*, 229–242.e4.
- 724 [11] Piccardi, P.; Vessman, B.; Mitri, S. *Proceedings of the National Academy of Sciences of the*  
725 *United States of America* **2019**, *116*, 15979–15984.
- 726 [12] Weiss, A. S. et al. *The ISME Journal* **2021**, *16*, 1095–1109.
- 727 [13] Foster, K. R.; Bell, T. *Current Biology* **2012**, *22*, 1845–1850.
- 728 [14] Qian, Y.; Lan, F.; Venturelli, O. S. *Current Opinion in Microbiology* **2021**, *62*, 84–92.
- 729 [15] Picot, A.; Shibasaki, S.; Meacock, O. J.; Mitri, S. *Current Opinion in Microbiology* **2023**, *75*,  
730 102354.
- 731 [16] Gralka, M.; Szabo, R.; Stocker, R.; Cordero, O. X. *Current Biology* **2020**, *30*, R1176–R1188.
- 732 [17] D'Souza, G.; Shitut, S.; Preussger, D.; Yousif, G.; Waschina, S.; Kost, C. *Natural Product*  
733 *Reports* **2018**, *35*, 455–488.
- 734 [18] Datta, M. S.; Sliwerska, E.; Gore, J.; Polz, M. F.; Cordero, O. X. *Nature Communications* **2016**,  
735 *7*, 11965.
- 736 [19] Granato, E. T.; Meiller-Legrand, T. A.; Foster, K. R. *Current Biology* **2019**, *29*, R521–R537.
- 737 [20] MacArthur, R. *Theoretical Population Biology* **1970**, *1*, 1–11.
- 738 [21] Tilman, D. *The American Naturalist* **1980**, *116*, 362–393.
- 739 [22] Koffel, T.; Daufresne, T.; Klausmeier, C. A. *Ecological Monographs* **2021**, *91*, e01458.
- 740 [23] Momeni, B.; Xie, L.; Shou, W. *eLife* **2017**, *6*.
- 741 [24] Chang, C.-Y.; Bajić, D.; Vila, J. C. C.; Estrela, S.; Sanchez, A. *Science* **2023**, *381*, 343–348.
- 742 [25] Friedman, J.; Higgins, L. M.; Gore, J. *Nature Ecology & Evolution* **2017**, *1*, 1–7.

- 743 [26] Dolinšek, J.; Goldschmidt, F.; Johnson, D. R. *FEMS Microbiology Reviews* **2016**, *40*, 961–  
744 979.
- 745 [27] Klitgord, N.; Segrè, D. *PLOS Computational Biology* **2010**, *6*, e1001002.
- 746 [28] Hoek, T. A.; Axelrod, K.; Biancalani, T.; Yurtsev, E. A.; Liu, J.; Gore, J. *PLOS Biology* **2016**,  
747 *14*, e1002540.
- 748 [29] Hammarlund, S. P.; Chacón, J. M.; Harcombe, W. R. *Environmental Microbiology* **2019**, *21*,  
749 759–771.
- 750 [30] Di Martino, R.; Picot, A.; Mitri, S. *bioRxiv* **2023**, 2023.05.24.542164.
- 751 [31] Rodríguez-Verdugo, A.; Vulin, C.; Ackermann, M. *Ecology Letters* **2019**, *22*, 838–846.
- 752 [32] Venkataram, S.; Kuo, H.-Y.; Hom, E. F. Y.; Kryazhimskiy, S. *Nature Ecology and Evolution*  
753 **2023**, *7*, 143–154.
- 754 [33] Daniels, M.; van Vliet, S.; Ackermann, M. *The ISME Journal* **2023**, 1–11.
- 755 [34] Nadell, C. D.; Drescher, K.; Foster, K. R. *Nature Reviews Microbiology* **2016**, *14*, 589–600.
- 756 [35] Wong, J. P. H.; Fischer-Stettler, M.; Zeeman, S. C.; Battin, T. J.; Persat, A. *Proceedings of*  
757 *the National Academy of Sciences* **2023**, *120*, e2217577120.
- 758 [36] Meszéna, G.; Gyllenberg, M.; Pásztor, L.; Metz, J. A. *Theoretical Population Biology* **2006**,  
759 *69*, 68–87.
- 760 [37] Estrela, S.; Libby, E.; Cleve, J. V.; Débarre, F.; Deforet, M.; Harcombe, W. R.; Peña, J.;  
761 Brown, S. P.; Hochberg, M. E. *Trends in Ecology and Evolution* **2019**, *34*, 6–18.
- 762 [38] Parker, R. F. *Experimental Biology and Medicine* **1946**, *63*, 443–446.
- 763 [39] Lenhard, J. R.; Bulman, Z. P. *Journal of Antimicrobial Chemotherapy* **2019**, *74*, 2825–2843.
- 764 [40] Mitri, S.; Richard Foster, K. *Annual Review of Genetics* **2013**, *47*, 247–273, PMID: 24016192.
- 765 [41] Kehe, J.; Ortiz, A.; Kulesa, A.; Gore, J.; Blainey, P. C.; Friedman, J. *Science Advances* **2021**,  
766 *7*, 7159.
- 767 [42] Orr, H. A.; Unckless, R. L. *PLOS Genetics* **2014**, *10*, e1004551.
- 768 [43] Ramsayer, J.; Kaltz, O.; Hochberg, M. E. *Evolutionary Applications* **2013**, *6*, 608–616.
- 769 [44] Agrawal, A. A. et al. *Frontiers in Ecology and the Environment* **2007**, *5*, 145–152.
- 770 [45] Bronstein, J. L. *Trends in Ecology and Evolution* **1994**, *9*, 214–217.
- 771 [46] Catford, J. A.; Wilson, J. R. U.; Pyšek, P.; Hulme, P. E.; Duncan, R. P. *Trends in Ecology and*  
772 *Evolution* **2022**, *37*, 158–170.
- 773 [47] Hernandez, M. J. *Proceedings of the Royal Society B: Biological Sciences* **1998**, *265*, 1433–  
774 1440.
- 775 [48] Holland, J. N.; Deangelis, D. L. *Ecology Letters* **2009**, *12*, 1357–1366.
- 776 [49] O’Dwyer, J. P. *Theoretical Ecology* **2018**, *11*, 441–452.
- 777 [50] Goldford, J. E.; Lu, N.; Bajić, D.; Estrela, S.; Tikhonov, M.; Sanchez-Gorostiaga, A.; Segrè, D.;  
778 Mehta, P.; Sanchez, A. *Science* **2018**, *361*, 469–474.

- 779 [51] Müller, M. J. I.; Neugeboren, B. I.; Nelson, D. R.; Murray, A. W. *Proceedings of the National*  
780 *Academy of Sciences of the United States of America* **2014**, *111*, 1037–1042.
- 781 [52] Yu, J. S. et al. *Nature Microbiology* **2022**, *7*, 542–555.
- 782 [53] Zelezniak, A.; Andrejev, S.; Ponomarova, O.; Mende, D. R.; Bork, P.; Patil, K. R. *Proceedings of*  
783 *the National Academy of Sciences of the United States of America* **2015**, *112*, 6449–6454.
- 784 [54] Roberts, D. W. *Vegetatio* **1987**, *69*, 27–33.
- 785 [55] Smith, C. R.; Glover, A. G.; Treude, T.; Higgs, N. D.; Amon, D. J. *Annual Review of Marine*  
786 *Science* **2015**, *7*, 571–596.
- 787 [56] Pontrelli, S.; Szabo, R.; Pollak, S.; Schwartzman, J.; Ledezma-Tejeida, D.; Cordero, O. X.;  
788 Sauer, U. *Science Advances* **2022**, *8*, eabk3076.
- 789 [57] Vannote, R. L.; Minshall, G. W.; Cummins, K. W.; Sedell, J. R.; Cushing, C. E. *Canadian Journal*  
790 *of Fisheries and Aquatic Sciences* **1980**, *37*, 130–137.
- 791 [58] Riva, A.; Kuzyk, O.; Forsberg, E.; Siuzdak, G.; Pfann, C.; Herbold, C.; Daims, H.; Loy, A.;  
792 Warth, B.; Berry, D. *Nature Communications* **2019**, *10*, 1–11.
- 793 [59] Pereira, F. C.; Berry, D. *Environmental Microbiology* **2017**, *19*, 1366–1378.
- 794 [60] Sanchez, A. *Cell Systems* **2019**, *9*, 519–520.
- 795 [61] Billick, I.; Case, T. J. *Ecology* **1994**, *75*, 1529–1543.
- 796 [62] Letten, A. D.; Stouffer, D. B. *Ecology Letters* **2019**, *22*, 423–436.
- 797 [63] Abrams, P. A. *The American Naturalist* **1983**, *121*, 887–891.
- 798 [64] Mickalide, H.; Kuehn, S. *Cell Systems* **2019**, *9*, 521–533.e10.
- 799 [65] Smith, H. L.; Waltman, P. *The Theory of the Chemostat: Dynamics of Microbial Competition*;  
800 Cambridge University Press, 1995.
- 801 [66] Sockett, R. E. *Annual Review of Microbiology* **2009**, *63*, 523–539.
- 802 [67] Hayes, C. S.; Aoki, S. K.; Low, D. A. *Annual Review of Genetics* **2010**, *44*, 71–90.
- 803 [68] Drescher, K.; Nadell, C. D.; Stone, H. A.; Wingreen, N. S.; Bassler, B. L. *Current Biology* **2014**,  
804 *24*, 50–55.
- 805 [69] Sulheim, S.; Mitri, S. *Trends in Microbiology* **2023**, *31*, 426–427.
- 806 [70] Kim, J.; Kim, H.-S.; Han, S.; Lee, J.-Y.; Oh, J.-E.; Chung, S.; Park, H.-D. *Lab on a Chip* **2013**,  
807 *13*, 1846–1849.
